# Supplementary material for: Underage JUUL Use Patterns: Content Analysis of Reddit Messages
Source: PubMed Central journal article supplement (PMC6786857; doi:10.2196/13038), 2019-09-09
Supplement: jmir_v21i9e13038_app1.pdf [file jmir_v21i9e13038_app1.pdf]

## Appendix 1 UnderageJuul Redditors Subreddit Interest

|                       |     |
|-----------------------|-----|
| juul                  | 437 |
| AskReddit             | 250 |
| trees                 | 145 |
| FortNiteBR            | 124 |
| Drugs                 | 123 |
| pics                  | 106 |
| Showerthoughts        | 102 |
| mildlyinteresting     | 101 |
| teenagers             | 96  |
| funny                 | 86  |
| aww                   | 82  |
| gaming                | 81  |
| FashionReps           | 80  |
| streetwear            | 75  |
| electronic_cigarette  | 74  |
| Sneakers              | 65  |
| gifs                  | 64  |
| supremeclothing       | 64  |
| pcmasterrace          | 64  |
| Vaping                | 60  |
| hiphopheads           | 60  |
| dankmemes             | 60  |
| news                  | 58  |
| videos                | 57  |
| explainlikeimfive     | 50  |
| weed                  | 49  |
| todayilearned         | 49  |
| BlackPeopleTwitter    | 46  |
| thanosdidnothingwrong | 45  |
| Jokes                 | 44  |
| LSD                   | 44  |
| AskOuija              | 43  |
| me_irl                | 43  |
| Repsneakers           | 43  |
| RoastMe               | 43  |
| jailbreak             | 41  |
| CircleofTrust         | 39  |
| The_Donald            | 39  |
| interestingasfuck     | 39  |
| buildapc              | 39  |
| GlobalOffensive       | 39  |
| trashy                | 39  |
| sports                | 35  |

|                   |    |
|-------------------|----|
| OldSchoolCool     | 34 |
| xboxone           | 33 |
| worldnews         | 33 |
| Music             | 33 |
| starterpacks      | 33 |
| NoStupidQuestions | 32 |
| cars              | 31 |
| tifu              | 31 |
| legaladvice       | 30 |
| Bitcoin           | 30 |
| personalfinance   | 29 |
| food              | 29 |
| saplins           | 29 |
| IAmA              | 29 |
| mildlyinfuriating | 28 |
| apple             | 28 |
| DesignerReps      | 28 |
| movies            | 28 |
| ecigclassifieds   | 28 |
| iphone            | 27 |
| Fitness           | 27 |
| Tinder            | 27 |
| EarthPorn         | 27 |
| oilpen            | 27 |
| memes             | 27 |
| ApplyingToCollege | 26 |
| depression        | 26 |
| whatisthisthing   | 26 |
| hardwareswap      | 26 |
| Advice            | 26 |
| nba               | 26 |
| askscience        | 25 |
| Overwatch         | 25 |
| LifeProTips       | 25 |
| FashionRepsBST    | 25 |
| thatHappened      | 25 |
| XXXTENTACION      | 24 |
| television        | 24 |
| madlads           | 24 |
| WTF               | 24 |
| DeepFriedMemes    | 24 |
| iamverysmart      | 24 |
| oddlysatisfying   | 24 |
| Rainbow6          | 23 |
| rickandmorty      | 23 |

|                      |    |
|----------------------|----|
| Kanye                | 23 |
| nottheonion          | 23 |
| CrappyDesign         | 23 |
| tipofmytongue        | 23 |
| Phix                 | 22 |
| vaporents            | 22 |
| PUBATTLEGROUNDS      | 22 |
| MemeEconomy          | 21 |
| Sat                  | 21 |
| pokemongo            | 21 |
| CringeAnarchy        | 21 |
| leagueoflegends      | 21 |
| techsupport          | 21 |
| science              | 21 |
| ImGoingToHellForThis | 21 |
| sneakermarket        | 20 |
| relationships        | 20 |
| confession           | 20 |
| Waxpen               | 19 |
| RepTime              | 19 |
| DrugStashes          | 19 |
| ComedyCemetery       | 19 |
| watchpeopledie       | 19 |
| assholedesign        | 19 |
| Cigarettes           | 19 |
| USPS                 | 18 |
| AskDocs              | 18 |
| politics             | 18 |
| h3h3productions      | 18 |
| StonerEngineering    | 18 |
| WWII                 | 18 |
| FellowKids           | 18 |
| slavelabour          | 18 |
| nfl                  | 18 |
| giftcardexchange     | 17 |
| opiates              | 17 |
| Supreme              | 17 |
| G59                  | 17 |
| DunderMifflin        | 17 |
| hmmm                 | 17 |
| greentext            | 17 |
| softwaregore         | 17 |
| NintendoSwitch       | 16 |
| woahdude             | 16 |
| SuorinAir            | 16 |

|                      |    |
|----------------------|----|
| benzodiazepines      | 16 |
| CryptoCurrency       | 16 |
| 4chan                | 16 |
| im14andthisisdeep    | 16 |
| BikiniBottomTwitter  | 16 |
| FORTnITE             | 16 |
| DarkNetMarketsNoobs  | 16 |
| darkjokes            | 16 |
| PUBG                 | 16 |
| airsoft              | 16 |
| researchchemicals    | 16 |
| iamverybadass        | 16 |
| Whatcouldgowrong     | 16 |
| dataisbeautiful      | 16 |
| malefashionadvice    | 16 |
| GlobalOffensiveTrade | 16 |
| sex                  | 15 |
| gtaonline            | 15 |
| NoFap                | 15 |
| baseball             | 15 |
| wholesomememes       | 15 |
| pokemon              | 15 |
| technology           | 15 |
| soccer               | 15 |
| space                | 15 |
| travisscott          | 15 |
| WhitePeopleTwitter   | 15 |
| insanepeoplefacebook | 15 |
| Watches              | 14 |
| Suorin               | 14 |
| MechanicalKeyboards  | 14 |
| UnethicalLifeProTips | 14 |
| AdviceAnimals        | 14 |
| EDC                  | 14 |
| nosleep              | 14 |
| APStudents           | 14 |
| PalaceClothing       | 14 |
| CBD                  | 14 |
| LateStageCapitalism  | 14 |
| LilPeep              | 14 |
| dxm                  | 14 |
| shrooms              | 14 |
| MadeMeSmile          | 14 |
| TwoXChromosomes      | 13 |
| Piracy               | 13 |

|                     |    |
|---------------------|----|
| sadcringe           | 13 |
| Art                 | 13 |
| CODZombies          | 13 |
| justneckbeardthings | 13 |
| PoliticalHumor      | 13 |
| instant_regret      | 13 |
| listentothis        | 13 |
| 4PanelCringe        | 13 |
| CallOfDuty          | 13 |
| WritingPrompts      | 13 |
| Unexpected          | 13 |
| AskMen              | 13 |
| PrequelMemes        | 13 |
| ADHD                | 13 |
| Vaping101           | 13 |
| photoshopbattles    | 13 |
| streetwearstartup   | 12 |
| malehairadvice      | 12 |
| ClashRoyale         | 12 |
| ClashOfClans        | 12 |
| summonerschool      | 12 |
| lacrosse            | 12 |
| battlestations      | 12 |
| SkincareAddiction   | 12 |
| drunk               | 12 |
| playrust            | 12 |
| GetMotivated        | 12 |
| Android             | 12 |
| ACT                 | 12 |
| wow                 | 12 |
| MechanicAdvice      | 12 |
| IdiotsInCars        | 12 |
| drugscirclejerk     | 12 |
| snapchat            | 12 |
| unpopularopinion    | 12 |
| Steam               | 12 |
| Ice_Poseidon        | 12 |
| PublicFreakout      | 12 |
| headphones          | 11 |
| conspiracy          | 11 |
| ChoosingBeggars     | 11 |
| meirl               | 11 |
| MaddenMobileForums  | 11 |
| hearthstone         | 11 |
| cringe              | 11 |

|                      |    |
|----------------------|----|
| TooAfraidToAsk       | 11 |
| Badfaketexts         | 11 |
| rap                  | 11 |
| keto                 | 11 |
| adderall             | 11 |
| IASIP                | 11 |
| Frat                 | 11 |
| atheism              | 11 |
| litecoin             | 11 |
| csgo                 | 11 |
| BeAmazed             | 11 |
| wallstreetbets       | 11 |
| NBA2k                | 11 |
| DestinyTheGame       | 11 |
| copypasta            | 11 |
| OutOfTheLoop         | 11 |
| sneakerbots          | 10 |
| DippingTobacco       | 10 |
| VapePorn             | 10 |
| ATBGE                | 10 |
| woooosh              | 10 |
| NatureIsFuckingLit   | 10 |
| marvelstudios        | 10 |
| chanceme             | 10 |
| blackmirror          | 10 |
| Stims                | 10 |
| GameSale             | 10 |
| pcgaming             | 10 |
| whatcarshouldIbuy    | 10 |
| Perfectfit           | 10 |
| GTAV                 | 10 |
| niceguys             | 10 |
| lgbt                 | 10 |
| VaporwaveAesthetics  | 10 |
| FortniteBattleRoyale | 10 |
| EntExchange          | 10 |
| youtube              | 10 |
| natureismetal        | 10 |
| fakehistoryporn      | 10 |
| findareddit          | 10 |
| SnapLenses           | 9  |
| inthesoulstone       | 9  |
| RocketLeagueExchange | 9  |
| FreeKarma4You        | 9  |
| anime                | 9  |

|                       |   |
|-----------------------|---|
| deepweb               | 9 |
| Dabs                  | 9 |
| college               | 9 |
| Conservative          | 9 |
| Damnthatinteresting   | 9 |
| leaves                | 9 |
| quityourbullshit      | 9 |
| Fallout               | 9 |
| RocketLeague          | 9 |
| iamatotalpieceofshit  | 9 |
| FIFA                  | 9 |
| EDM                   | 9 |
| Anxiety               | 9 |
| MDMA                  | 9 |
| shoebots              | 9 |
| buildapcsales         | 9 |
| blackops3             | 9 |
| creepy                | 9 |
| MaddenUltimateTeam    | 9 |
| crappyoffbrands       | 9 |
| OopsDidntMeanTo       | 9 |
| beermoney             | 9 |
| cursedimages          | 9 |
| brockhampton          | 9 |
| subaru                | 9 |
| Futurology            | 9 |
| Minecraft             | 9 |
| BMW                   | 9 |
| CoDCompetitive        | 8 |
| motorcycles           | 8 |
| LivestreamFail        | 8 |
| drugsarebeautiful     | 8 |
| tattoos               | 8 |
| pyrocynical           | 8 |
| phenibut              | 8 |
| cocaine               | 8 |
| youtubehaiku          | 8 |
| confessions           | 8 |
| highschool            | 8 |
| cringepics            | 8 |
| notinteresting        | 8 |
| nostalgia             | 8 |
| bapeheads             | 8 |
| Smite                 | 8 |
| confusing_perspective | 8 |

|                       |   |
|-----------------------|---|
| books                 | 8 |
| garlicoin             | 8 |
| RepVouch              | 8 |
| Memes_Of_The_Dank     | 8 |
| 2007scape             | 8 |
| relationship_advice   | 8 |
| Nootropics            | 8 |
| smashbros             | 8 |
| PewdiepieSubmissions  | 8 |
| antisocialsocialclub  | 8 |
| dontdeadopeninside    | 8 |
| rage                  | 8 |
| Animemes              | 8 |
| oldpeoplefacebook     | 8 |
| PS4                   | 8 |
| circlejerk            | 8 |
| HomeworkHelp          | 8 |
| NYCtrees              | 8 |
| gatekeeping           | 8 |
| casualiamama          | 8 |
| shameless             | 8 |
| gameswap              | 8 |
| UpliftingNews         | 8 |
| RobinHood             | 8 |
| shittyfoodporn        | 8 |
| GothBoiClique         | 8 |
| ProgrammerHumor       | 8 |
| AMA                   | 8 |
| Wellthatsucks         | 8 |
| Eyebleach             | 8 |
| gonewild              | 7 |
| halo                  | 7 |
| facepalm              | 7 |
| nevertellmethetheodds | 7 |
| TumblrInAction        | 7 |
| iOSthemes             | 7 |
| Roadcam               | 7 |
| carporn               | 7 |
| engrish               | 7 |
| rarepuppers           | 7 |
| loseit                | 7 |
| PhotoshopRequest      | 7 |
| JuulPod               | 7 |
| fuckthepopulation     | 7 |
| cats                  | 7 |



|                       |   |
|-----------------------|---|
| RotMG                 | 7 |
| newjersey             | 7 |
| LGBTeens              | 7 |
| PornhubComments       | 7 |
| GCXRep                | 7 |
| bonehurtingjuice      | 7 |
| CasualConversation    | 7 |
| indianpeoplefacebook  | 7 |
| 2meirl4meirl          | 7 |
| EscapefromTarkov      | 7 |
| applehelp             | 7 |
| investing             | 7 |
| PUBGMobile            | 7 |
| ThriftStoreHauls      | 7 |
| playboicarti          | 7 |
| farcry                | 7 |
| reactiongifs          | 7 |
| Blackops4             | 7 |
| golf                  | 7 |
| FrankOcean            | 7 |
| Libertarian           | 7 |
| okbuddyretard         | 7 |
| StarWars              | 7 |
| Documentaries         | 7 |
| Flipping              | 7 |
| dadjokes              | 7 |
| medical               | 7 |
| tipofmypenis          | 7 |
| RecruitCS             | 7 |
| Psychedelics          | 7 |
| GarlicBreadMemes      | 7 |
| blackmagicfuckery     | 7 |
| creepyPMs             | 7 |
| longboarding          | 7 |
| CannabisExtracts      | 7 |
| learnprogramming      | 6 |
| Instagram             | 6 |
| OFWGKTA               | 6 |
| Justrolledintotheshop | 6 |
| mildlypenis           | 6 |
| teenagersnew          | 6 |
| CatsStandingUp        | 6 |
| WatchPeopleDieInside  | 6 |
| hookah                | 6 |
| Jeep                  | 6 |

|                      |   |
|----------------------|---|
| HowToHack            | 6 |
| NameThatSong         | 6 |
| Dreams               | 6 |
| Ooer                 | 6 |
| iPhoneX              | 6 |
| KidsAreFuckingStupid | 6 |
| SuicideWatch         | 6 |
| betterCallSaul       | 6 |
| AnimalsBeingBros     | 6 |
| ihavesex             | 6 |
| redditgetsdrawn      | 6 |
| chinaglass           | 6 |
| laptops              | 6 |
| aves                 | 6 |
| popping              | 6 |
| IsItBullshit         | 6 |
| paypal               | 6 |
| Rateme               | 6 |
| lego                 | 6 |
| stocks               | 6 |
| DDLC                 | 6 |
| ass                  | 6 |
| DoesAnybodyElse      | 6 |
| gratefuldead         | 6 |
| Fishing              | 6 |
| progresspics         | 6 |
| buildapcforme        | 6 |
| WouldYouRather       | 6 |
| RandomKindness       | 6 |
| liluzivert           | 6 |
| NoMansSkyTheGame     | 6 |
| Justfuckmyshitup     | 6 |
| FortniteCompetitive  | 6 |
| NotMyJob             | 6 |
| GalaxyS8             | 6 |
| Marijuana            | 6 |
| HumansBeingBros      | 6 |
| Lollapalooza         | 6 |
| donaldglover         | 6 |
| BetterEveryLoop      | 6 |
| ChildrenFallingOver  | 6 |
| ArtOfRolling         | 6 |
| HomeNetworking       | 6 |
| whatsthisbug         | 6 |
| Vape_Porn            | 6 |

|                     |   |
|---------------------|---|
| Greekgodx           | 6 |
| Ebay                | 6 |
| zedmains            | 6 |
| StarWarsBattlefront | 6 |
| happy               | 6 |
| battlefield_one     | 6 |
| vapeitforward       | 6 |
| NotHowDrugsWork     | 6 |
| morbidquestions     | 6 |
| history             | 6 |
| thalassophobia      | 6 |
| FiftyFifty          | 6 |
| treedibles          | 6 |
| bodybuilding        | 6 |
| Accutane            | 6 |
| Idubbbz             | 6 |
| dating_advice       | 6 |
| offmychest          | 6 |
| outrun              | 6 |
| kratom              | 6 |
| shittyaskscience    | 6 |
| SuggestALaptop      | 6 |
| HeistTeams          | 6 |
| Bossfight           | 6 |
| nyc                 | 6 |
| onions              | 6 |
| hittableFaces       | 6 |
| IllegalLifeProTips  | 6 |
| sportsbook          | 6 |
| ShittyLifeProTips   | 6 |
| Eminem              | 6 |
| airsoftmarket       | 6 |
| tmobile             | 6 |
| theydidthemath      | 6 |
| hacking             | 5 |
| 3Dprinting          | 5 |
| freebies            | 5 |
| MurderedByWords     | 5 |
| spotify             | 5 |
| bicycling           | 5 |
| DIY                 | 5 |
| randomactsofcsgo    | 5 |
| sideloaded          | 5 |
| antiMLM             | 5 |
| Shitty_Car_Mods     | 5 |

|                     |   |
|---------------------|---|
| PandR               | 5 |
| governorsball       | 5 |
| magicTCG            | 5 |
| alcohol             | 5 |
| cigars              | 5 |
| Petioles            | 5 |
| FlashTV             | 5 |
| place               | 5 |
| chicago             | 5 |
| seduction           | 5 |
| appleswap           | 5 |
| TrueOffMyChest      | 5 |
| destiny2            | 5 |
| trashyboners        | 5 |
| BoJackHorseman      | 5 |
| sbubby              | 5 |
| Entrepreneur        | 5 |
| instantkarma        | 5 |
| loltyler1           | 5 |
| LucidDreaming       | 5 |
| fantasyfootball     | 5 |
| skyrim              | 5 |
| OSHA                | 5 |
| trap                | 5 |
| AppleWatch          | 5 |
| VPN                 | 5 |
| powerwashingporn    | 5 |
| tippytops           | 5 |
| borrow              | 5 |
| ethereum            | 5 |
| Frugal              | 5 |
| TheLastAirbender    | 5 |
| gameofthrones       | 5 |
| computers           | 5 |
| Vans                | 5 |
| rant                | 5 |
| Naruto              | 5 |
| MaliciousCompliance | 5 |
| KarmaConspiracy     | 5 |
| apolloapp           | 5 |
| itookapicture       | 5 |
| evilbuildings       | 5 |
| amazon              | 5 |
| bostonceltics       | 5 |
| SteamGameSwap       | 5 |

|                       |   |
|-----------------------|---|
| FilthyFrank           | 5 |
| electronicmusic       | 5 |
| WhatsWrongWithYourDog | 5 |
| bindingofisaac        | 5 |
| KendrickLamar         | 5 |
| nononono              | 5 |
| redditbay             | 5 |
| eagles                | 5 |
| JusticeServed         | 5 |
| CrazyIdeas            | 5 |
| translator            | 5 |
| Seaofthieves          | 5 |
| makinghiphop          | 5 |
| FidgetSpinners        | 5 |
| mechmarket            | 5 |
| urbanexploration      | 5 |
| beetlejuicing         | 5 |
| mac                   | 5 |
| tumblr                | 5 |
| therewasanattempt     | 5 |
| asktrp                | 5 |
| jobs                  | 5 |
| btc                   | 5 |
| gadgets               | 5 |
| Logic_301             | 5 |
| juulrefill            | 5 |
| PeopleFuckingDying    | 5 |
| FloridaMan            | 5 |
| Psychonaut            | 5 |
| westworld             | 5 |
| Patriots              | 5 |
| Games                 | 5 |
| mflb                  | 5 |
| doordash              | 5 |
| flatbushzombies       | 5 |
| netflix               | 5 |
| NiceHash              | 5 |
| raisedbynarcissists   | 5 |
| HelpMeFind            | 5 |
| snowboarding          | 5 |
| guns                  | 5 |
| drums                 | 4 |
| ShouldIbuythisgame    | 4 |
| comedyheaven          | 4 |
| CFB                   | 4 |

|                     |   |
|---------------------|---|
| IBO                 | 4 |
| csgotrade           | 4 |
| ft86                | 4 |
| HipHopImages        | 4 |
| StrangerThings      | 4 |
| moviepass           | 4 |
| AmItheAsshole       | 4 |
| Grailed             | 4 |
| CatastrophicFailure | 4 |
| see                 | 4 |
| creepypasta         | 4 |
| brooklynninenine    | 4 |
| Doom                | 4 |
| lostredditors       | 4 |
| SweatyPalms         | 4 |
| FL_Studio           | 4 |
| microgrowery        | 4 |
| forhonor            | 4 |
| PUBGXboxOne         | 4 |
| torrents            | 4 |
| verizon             | 4 |
| smoobypost          | 4 |
| MakeupAddiction     | 4 |
| Gamingcirclejerk    | 4 |
| JizzedToThis        | 4 |
| MLS                 | 4 |
| skiing              | 4 |
| teslamotors         | 4 |
| nocontextpics       | 4 |
| trebuchetmemes      | 4 |
| europe              | 4 |
| totallynotrobots    | 4 |
| Warframe            | 4 |
| rotmgtradingpost    | 4 |
| diablo3             | 4 |
| MakeNewFriendsHere  | 4 |
| Target              | 4 |
| Favors              | 4 |
| StreetwearSales     | 4 |
| Dentistry           | 4 |
| RandomActsOfGaming  | 4 |
| CHICubs             | 4 |
| amiugly             | 4 |
| uselessredcircle    | 4 |
| OnePiece            | 4 |

|                     |   |
|---------------------|---|
| AskNYC              | 4 |
| Amd                 | 4 |
| UnresolvedMysteries | 4 |
| Windows10           | 4 |
| nonononoyes         | 4 |
| iOSBeta             | 4 |
| Blink182            | 4 |
| Mustang             | 4 |
| thewalkingdead      | 4 |
| breakingbad         | 4 |
| ketamine            | 4 |
| 2healthbars         | 4 |
| HistoryMemes        | 4 |
| 1P_LSD              | 4 |
| pebble              | 4 |
| MMA                 | 4 |
| GamePhysics         | 4 |
| techsupportgore     | 4 |
| millionairemakers   | 4 |
| Cartalk             | 4 |
| AskHistorians       | 4 |
| sixers              | 4 |
| MandelaEffect       | 4 |
| CryptoMarkets       | 4 |
| bigdickproblems     | 4 |
| Braincels           | 4 |
| lifehacks           | 4 |
| Miata               | 4 |
| snakes              | 4 |
| paintball           | 4 |
| JoeRogan            | 4 |
| Supreme_NYC         | 4 |
| caps                | 4 |
| Maplestory          | 4 |
| Cameras             | 4 |
| trailerparkboys     | 4 |
| CozyPlaces          | 4 |
| NavyBlazer          | 4 |
| NYYankees           | 4 |
| Surface             | 4 |
| fountainpens        | 4 |
| GameTrade           | 4 |
| highdeas            | 4 |
| Ripple              | 4 |
| GooglePixel         | 4 |

|                       |   |
|-----------------------|---|
| Twitch                | 4 |
| coins                 | 4 |
| popheads              | 4 |
| dank_meme             | 4 |
| wicked_edge           | 4 |
| YasuoMains            | 4 |
| javahelp              | 4 |
| PAXvapor              | 4 |
| boottoobig            | 4 |
| GrandTheftAutoV       | 4 |
| NewTubers             | 4 |
| Borderlands2          | 4 |
| GamersRiseUp          | 4 |
| ScottishPeopleTwitter | 4 |
| gtaglitches           | 4 |
| ios                   | 4 |
| holdmycosmo           | 4 |
| AccidentalWesAnderson | 4 |
| forbiddensnacks       | 4 |
| CallOfDutyWorldWarTwo | 4 |
| holdmybeer            | 4 |
| Fantasy_Football      | 4 |
| boston                | 4 |
| iphonehelp            | 4 |
| watercooling          | 4 |
| delusionalcraigslist  | 4 |
| postmates             | 4 |
| socialanxiety         | 4 |
| Paladins              | 4 |
| AccidentalRacism      | 4 |
| Brawlhalla            | 4 |
| MapPorn               | 4 |
| AwesomeCarMods        | 4 |
| Dell                  | 4 |
| Whatisthis            | 4 |
| Metalcore             | 4 |
| RoastMyCar            | 4 |
| ChanceTheRapper       | 4 |
| Graffiti              | 4 |
| DMT                   | 4 |
| malefashion           | 4 |
| help                  | 4 |
| longisland            | 4 |
| audiophile            | 4 |
| afinil                | 4 |



|                       |   |
|-----------------------|---|
| MouseReview           | 4 |
| bisexual              | 4 |
| Pareidolia            | 4 |
| MarvelStudiosSpoilers | 4 |
| DotA2                 | 4 |
| CollegeBasketball     | 4 |
| educationalgifs       | 4 |
| discordapp            | 4 |
| communism             | 4 |
| Autos                 | 4 |
| SampleSize            | 4 |
| disneyvacation        | 4 |
| HaloOnline            | 4 |
| TalesFromRetail       | 4 |
| photography           | 4 |
| samsung               | 4 |
| buildmeapc            | 4 |
| 3dshacks              | 4 |
| macbook               | 4 |
| Brawlstars            | 4 |
| hockey                | 4 |
| glassheads            | 4 |
| washingtondc          | 4 |
| Bestbuy               | 4 |
| blunderyears          | 4 |
| OverwatchUniversity   | 4 |
| projectcar            | 4 |
| Knife_Swap            | 4 |
| Aquariums             | 4 |
| The_Mueller           | 4 |
| AbandonedPorn         | 4 |
| shareyourmusic        | 3 |
| linuxquestions        | 3 |
| mechanical_gifs       | 3 |
| pillhead              | 3 |
| Christianity          | 3 |
| gifsthatkeepongiving  | 3 |
| PocketMortys          | 3 |
| SBU                   | 3 |
| iosgaming             | 3 |
| StackAdvice           | 3 |
| albania               | 3 |
| Anarcho_Capitalism    | 3 |
| 195                   | 3 |
| answers               | 3 |

|                       |   |
|-----------------------|---|
| WhatIsThisPainting    | 3 |
| redsox                | 3 |
| Accounting            | 3 |
| GamingMarket          | 3 |
| DirtySnapchat         | 3 |
| csgobetting           | 3 |
| networking            | 3 |
| AlphaBay              | 3 |
| pens                  | 3 |
| MealPrepSunday        | 3 |
| terriblefacebookmemes | 3 |
| alteredcarbon         | 3 |
| Flexicas              | 3 |
| torrentlinks          | 3 |
| PKA                   | 3 |
| DiWHY                 | 3 |
| ShowerOrange          | 3 |
| Boruto                | 3 |
| Assistance            | 3 |
| wownoob               | 3 |
| disenchantment        | 3 |
| Money                 | 3 |
| DataHoarder           | 3 |
| UberEATS              | 3 |
| UMD                   | 3 |
| LosAngeles            | 3 |
| CCW                   | 3 |
| writing               | 3 |
| vaxxhappened          | 3 |
| running               | 3 |
| povertyfinance        | 3 |
| UNBGBBIIVCHIDCTIICBG  | 3 |
| MW2                   | 3 |
| ShadowBan             | 3 |
| TheRedPill            | 3 |
| churning              | 3 |
| VirginiaTech          | 3 |
| BreakUps              | 3 |
| CoinBase              | 3 |
| im14andthisisfunny    | 3 |
| PuzzleAndDragons      | 3 |
| GiftofGames           | 3 |
| venmo                 | 3 |
| Jazz                  | 3 |
| flying                | 3 |

|                   |   |
|-------------------|---|
| audio             | 3 |
| yeezys            | 3 |
| airpods           | 3 |
| HighQualityGifs   | 3 |
| gardening         | 3 |
| Lyft              | 3 |
| Lifeguards        | 3 |
| exchristian       | 3 |
| lonely            | 3 |
| GTA               | 3 |
| hamptonbrandon    | 3 |
| Csgohacks         | 3 |
| scooters          | 3 |
| succulents        | 3 |
| thick             | 3 |
| whatsthisplant    | 3 |
| woweconomy        | 3 |
| DIY_eJuice        | 3 |
| WeWantPlates      | 3 |
| BSA               | 3 |
| deadbydaylight    | 3 |
| highcandy         | 3 |
| dankvideos        | 3 |
| ToiletPaperUSA    | 3 |
| MaleFashionMarket | 3 |
| AntiJokes         | 3 |
| Debate            | 3 |
| LofiHipHop        | 3 |
| MkeBucks          | 3 |
| navy              | 3 |
| Cubers            | 3 |
| fastfood          | 3 |
| TheOA             | 3 |
| titanfall         | 3 |
| AskPhysics        | 3 |
| GifSound          | 3 |
| tf2               | 3 |
| travel            | 3 |
| BitcoinMining     | 3 |
| malelivingspace   | 3 |
| SlumpGod          | 3 |
| hockeyplayers     | 3 |
| socialmedia       | 3 |
| badtattoos        | 3 |
| TripSit           | 3 |

|                     |   |
|---------------------|---|
| DAE                 | 3 |
| arrow               | 3 |
| emojipasta          | 3 |
| wholesomebpt        | 3 |
| sad                 | 3 |
| GolfGTI             | 3 |
| addiction           | 3 |
| Comcast_Xfinity     | 3 |
| wholesomegifs       | 3 |
| socialskills        | 3 |
| GameDeals           | 3 |
| BattlefrontTWO      | 3 |
| forwardsfromgrandma | 3 |
| SwagBucks           | 3 |
| BuyItForLife        | 3 |
| FortniteFashion     | 3 |
| photocritique       | 3 |
| Disneyland          | 3 |
| warpedtour          | 3 |
| dayz                | 3 |
| Hacking_Tutorials   | 3 |
| bravefrontier       | 3 |
| NobodyAsked         | 3 |
| hardware            | 3 |
| jailbreakdevelopers | 3 |
| changemyview        | 3 |
| Marvel              | 3 |
| glitch_art          | 3 |
| comics              | 3 |
| BitMarket           | 3 |
| BokuNoHeroAcademia  | 3 |
| mlb                 | 3 |
| trippinthroughtime  | 3 |
| whatsthissnake      | 3 |
| suspiciousquotes    | 3 |
| surfing             | 3 |
| PoliticalDiscussion | 3 |
| SpidermanPS4        | 3 |
| replications        | 3 |
| h1z1                | 3 |
| perfectloops        | 3 |
| gaitit              | 3 |
| SandersForPresident | 3 |
| supergirlTV         | 3 |
| Guitar              | 3 |

|                      |   |
|----------------------|---|
| FoodPorn             | 3 |
| customhearthstone    | 3 |
| ThreadGames          | 3 |
| ElsaGate             | 3 |
| SwordOrSheath        | 3 |
| NHLHUT               | 3 |
| cpp_questions        | 3 |
| FifaCareers          | 3 |
| TwoRedditorsOneCup   | 3 |
| NJTech               | 3 |
| FortnitePS4          | 3 |
| shopify              | 3 |
| Calligraphy          | 3 |
| Seattle              | 3 |
| frugalmalefashion    | 3 |
| ProRevenge           | 3 |
| vita                 | 3 |
| THE_PACK             | 3 |
| SLRep                | 3 |
| Coffee               | 3 |
| orangeisthenewblack  | 3 |
| Vive                 | 3 |
| bloodborne           | 3 |
| drugmemes            | 3 |
| thedivision          | 3 |
| sadboys              | 3 |
| soylent              | 3 |
| MosinNagant          | 3 |
| AskWomen             | 3 |
| BiggerThanYouThought | 3 |
| traaaaaannnnnnnnns   | 3 |
| BostonBruins         | 3 |
| Breath_of_the_Wild   | 3 |
| Cyberpunk            | 3 |
| PodMods              | 3 |
| shittyama            | 3 |
| NSFW411              | 3 |
| short                | 3 |
| PostMalone           | 3 |
| cakeday              | 3 |
| MeanJokes            | 3 |
| AfterEffects         | 3 |
| shittyrainbow6       | 3 |
| PixelCarRacer        | 3 |
| ShinyPokemon         | 3 |

|                      |   |
|----------------------|---|
| tylerthecreator      | 3 |
| lost                 | 3 |
| theocho              | 3 |
| chairsunderwater     | 3 |
| webdev               | 3 |
| SuddenlyGay          | 3 |
| KitchenConfidential  | 3 |
| NewSkaters           | 3 |
| Rivenmains           | 3 |
| learnpython          | 3 |
| SubsYouFellFor       | 3 |
| woodworking          | 3 |
| BartardStories       | 3 |
| selfharm             | 3 |
| vape_deals           | 3 |
| bostontrees          | 3 |
| savedyouaclick       | 3 |
| toosoon              | 3 |
| runescape            | 3 |
| cheatatmathhomework  | 3 |
| Barca                | 3 |
| CampingandHiking     | 3 |
| ableton              | 3 |
| holdmyredbull        | 3 |
| pcgamingtechsupport  | 3 |
| edmproduction        | 3 |
| ShadowBanned         | 3 |
| computer_help        | 3 |
| nvidia               | 3 |
| ComedyNecrophilia    | 3 |
| Retconned            | 3 |
| highthoughts         | 3 |
| ColorizedHistory     | 3 |
| DeFranco             | 3 |
| Hardcore             | 3 |
| Battlefield          | 3 |
| counterstrike        | 3 |
| pinkfloyd            | 3 |
| schizophrenia        | 3 |
| NSFWFunny            | 3 |
| self                 | 3 |
| Xenoblade_Chronicles | 3 |
| Meditation           | 3 |
| SaltLakeCity         | 3 |
| nintendo             | 3 |

|                      |   |
|----------------------|---|
| ChiefKeef            | 3 |
| gamingpc             | 3 |
| ofcoursethatsathing  | 3 |
| BoneAppleTea         | 3 |
| lgg4                 | 3 |
| ethtrader            | 3 |
| FunnyandSad          | 3 |
| TheSilphRoad         | 3 |
| SneakerMarketRefs    | 3 |
| jobuds               | 3 |
| surrealmemes         | 3 |
| childfree            | 3 |
| dpdr                 | 3 |
| fo4                  | 3 |
| Blep                 | 3 |
| nuzlocke             | 3 |
| bestof               | 3 |
| friendsafari         | 3 |
| Vaporwave            | 3 |
| boostedboards        | 3 |
| ShroomID             | 3 |
| awfuleyebrows        | 3 |
| OffensiveMemes       | 3 |
| ambien               | 3 |
| Parenting            | 3 |
| audioengineering     | 3 |
| WeAreTheMusicMakers  | 3 |
| overclocking         | 3 |
| MortalKombat         | 3 |
| SCP                  | 3 |
| DeepIntoYouTube      | 3 |
| tipofmyjoystick      | 3 |
| lean                 | 3 |
| CapitalismVSocialism | 3 |
| porn_gifs            | 3 |
| PokemonGoSpoofing    | 3 |
| Corsair              | 3 |
| survivor             | 3 |
| Watchexchange        | 2 |
| tea                  | 2 |
| Gameboy              | 2 |
| HouseOfCards         | 2 |
| battlefield_4        | 2 |
| metalgearsolid       | 2 |
| RapLeaks             | 2 |

|                    |   |
|--------------------|---|
| 3DS                | 2 |
| feetpics           | 2 |
| Bass               | 2 |
| newhampshire       | 2 |
| WaltDisneyWorld    | 2 |
| Hiphopcirclejerk   | 2 |
| ComedyHitmen       | 2 |
| chemistry          | 2 |
| fasting            | 2 |
| MacOS              | 2 |
| BitcoinBeginners   | 2 |
| TittyDrop          | 2 |
| amathenedit        | 2 |
| cursedcursedimages | 2 |
| ucf                | 2 |
| bipolar            | 2 |
| Rabbits            | 2 |
| PornStars          | 2 |
| Polaroid           | 2 |
| MLBTheShow         | 2 |
| RepLadies          | 2 |
| GuitarHero         | 2 |
| askcarsales        | 2 |
| dubai              | 2 |
| synthrecipes       | 2 |
| Zippo              | 2 |
| rotmgvouches       | 2 |
| LSA                | 2 |
| MovieDetails       | 2 |
| androidapps        | 2 |
| AdrenalinePorn     | 2 |
| guitarcirclejerk   | 2 |
| Dirtbikes          | 2 |
| acting             | 2 |
| harrypotter        | 2 |
| InclusiveOr        | 2 |
| vegan              | 2 |
| holdmyfries        | 2 |
| FortniteBRMeta     | 2 |
| JUSTNOMIL          | 2 |
| auburn             | 2 |
| shittyreactiongifs | 2 |
| mcservers          | 2 |
| wholesomeanimemes  | 2 |
| ASU                | 2 |



|                       |   |
|-----------------------|---|
| AskThe_Donald         | 2 |
| Drizzy                | 2 |
| Beatmatch             | 2 |
| lewrongeneration      | 2 |
| HappyEmbarrassedGirls | 2 |
| vainglorygame         | 2 |
| Vape_Reviews          | 2 |
| sandiego              | 2 |
| RepWatch              | 2 |
| UIUC                  | 2 |
| feedthebeast          | 2 |
| puns                  | 2 |
| ElderScrolls          | 2 |
| DenzelCurry           | 2 |
| web_design            | 2 |
| tooktoomuch           | 2 |
| microdosing           | 2 |
| thegrandtour          | 2 |
| BestOfStreamingVideo  | 2 |
| IndianaUniversity     | 2 |
| Scams                 | 2 |
| masterhacker          | 2 |
| supermoto             | 2 |
| migos                 | 2 |
| icocrypto             | 2 |
| battlewagon           | 2 |
| DesignPorn            | 2 |
| MTVScream             | 2 |
| earthbound            | 2 |
| arcane                | 2 |
| ReverseChanceMe       | 2 |
| xTrill                | 2 |
| SiliconValleyHBO      | 2 |
| Chipotle              | 2 |
| nathanforyou          | 2 |
| ski                   | 2 |
| windows               | 2 |
| Fuckthealtright       | 2 |
| analog                | 2 |
| PandoranRedCross      | 2 |
| pornfree              | 2 |
| circumcision          | 2 |
| rule34                | 2 |
| Random_Acts_Of_Pizza  | 2 |
| AskTrumpSupporters    | 2 |

|                      |   |
|----------------------|---|
| Drama                | 2 |
| AndroidHelp          | 2 |
| PhantomForces        | 2 |
| minibikes            | 2 |
| samuraijack          | 2 |
| sunglasses           | 2 |
| ffxiv                | 2 |
| nunumains            | 2 |
| Shave_Bazaar         | 2 |
| KeanuBeingAwesome    | 2 |
| Breadit              | 2 |
| UnpopularOpinions    | 2 |
| infj                 | 2 |
| ClashOfClansRecruit  | 2 |
| OCD                  | 2 |
| pettyrevenge         | 2 |
| askwomenadvice       | 2 |
| marketing            | 2 |
| couriersofreddit     | 2 |
| Ratemeteen           | 2 |
| Gear4Sale            | 2 |
| Paranormal           | 2 |
| Rengarmains          | 2 |
| ask                  | 2 |
| Stance               | 2 |
| Cuckold              | 2 |
| Vape_Chat            | 2 |
| JuulSupport          | 2 |
| dropship             | 2 |
| suboxone             | 2 |
| hiphop               | 2 |
| FortniteRoyaleLFG    | 2 |
| Jeopardy             | 2 |
| gunpolitics          | 2 |
| Bitcoincash          | 2 |
| JordanPeterson       | 2 |
| talesfromcavesupport | 2 |
| pathofexile          | 2 |
| Monstercat           | 2 |
| MacMiller            | 2 |
| TalesFromThePizzaGuy | 2 |
| CheggAnswerRequest   | 2 |
| warriors             | 2 |
| eu4                  | 2 |
| SneakerDeals         | 2 |

|                       |   |
|-----------------------|---|
| RLFashionAdvice       | 2 |
| TalesFromYourServer   | 2 |
| hqtrivia              | 2 |
| AskBattlestations     | 2 |
| wokekids              | 2 |
| Celebs                | 2 |
| ffffffuuuuuuuuuuuuuu  | 2 |
| AskRedditAfterDark    | 2 |
| CryptoKitties         | 2 |
| knives                | 2 |
| walmart               | 2 |
| RedditInReddit        | 2 |
| ultrawidemasterrace   | 2 |
| Celica                | 2 |
| CampFlognaw           | 2 |
| ElectricSkateboarding | 2 |
| bose                  | 2 |
| ProtectAndServe       | 2 |
| rush                  | 2 |
| FreeKarma4U           | 2 |
| Dexter                | 2 |
| Superbowl             | 2 |
| Volvo                 | 2 |
| Tendies               | 2 |
| MCSRep                | 2 |
| adorableporn          | 2 |
| thisismylifenow       | 2 |
| NHL18                 | 2 |
| Astronomy             | 2 |
| LootRoyale            | 2 |
| SubOhmTanks           | 2 |
| wifesharing           | 2 |
| RealGirls             | 2 |
| TOR                   | 2 |
| Sexsells              | 2 |
| cubancigars           | 2 |
| muacirclejerk         | 2 |
| ufl                   | 2 |
| dontputyourdickinthat | 2 |
| Throwers              | 2 |
| FixedGearBicycle      | 2 |
| AstralProjection      | 2 |
| manga                 | 2 |
| SquaredCircle         | 2 |
| absolutelynotme_irl   | 2 |

|                      |   |
|----------------------|---|
| steelers             | 2 |
| HENTAI_GIF           | 2 |
| HUTrep               | 2 |
| minnesota            | 2 |
| econhw               | 2 |
| Sneks                | 2 |
| dbz                  | 2 |
| regularcarreviews    | 2 |
| TheGirlSurvivalGuide | 2 |
| Feminism             | 2 |
| KarmaCourt           | 2 |
| roosterteeth         | 2 |
| GrandTheftAutoV_PC   | 2 |
| namethatcar          | 2 |
| Golfwang             | 2 |
| pokemontrades        | 2 |
| ploompax             | 2 |
| blog                 | 2 |
| WatchItForThePlot    | 2 |
| Detroit              | 2 |
| porninfifteenseconds | 2 |
| StonerProTips        | 2 |
| Charlotte            | 2 |
| razer                | 2 |
| darksouls3           | 2 |
| KaynMains            | 2 |
| Spiderman            | 2 |
| Pen_Swap             | 2 |
| CTents               | 2 |
| motorizedbicycles    | 2 |
| bassfishing          | 2 |
| cosplay              | 2 |
| simps                | 2 |
| yugioh               | 2 |
| freefolk             | 2 |
| CryptoCurrencies     | 2 |
| sleep                | 2 |
| ar15                 | 2 |
| PostHardcore         | 2 |
| WWEGames             | 2 |
| PickAnAndroidForMe   | 2 |
| DarlingInTheFranxx   | 2 |
| rulesofsurvival      | 2 |
| weekendgunnit        | 2 |
| ps3homebrew          | 2 |

|                     |   |
|---------------------|---|
| SocialEngineering   | 2 |
| fo76                | 2 |
| DrumkitTrading      | 2 |
| AdventureCapitalist | 2 |
| weddingplanning     | 2 |
| Cash4Cash           | 2 |
| freestickers        | 2 |
| thingsforants       | 2 |
| Bape                | 2 |
| gay_irl             | 2 |
| SSBM                | 2 |
| agt                 | 2 |
| csuf                | 2 |
| CraftBeer           | 2 |
| Dynavap             | 2 |
| JustBootThings      | 2 |
| Fireteams           | 2 |
| girlsinyogapants    | 2 |
| TeamRedditTeams     | 2 |
| suicidebywords      | 2 |
| vinyl               | 2 |
| vlog                | 2 |
| yesyesyesno         | 2 |
| teefies             | 2 |
| Blackbear           | 2 |
| LetsNotMeet         | 2 |
| kings               | 2 |
| FulfillmentByAmazon | 2 |
| HaggardGarage       | 2 |
| jesuschristreddit   | 2 |
| adultswim           | 2 |
| CoutureReps         | 2 |
| h3h3_productions    | 2 |
| MathHelp            | 2 |
| google              | 2 |
| PenmanshipPorn      | 2 |
| linux4noobs         | 2 |
| BBQ                 | 2 |
| sarmsourcetalk      | 2 |
| Xiaomi              | 2 |
| santaclaritadiet    | 2 |
| mildyinteresting    | 2 |
| shadowofmordor      | 2 |
| IOTAmarkets         | 2 |
| exoticspotting      | 2 |

|                     |   |
|---------------------|---|
| ContagiousLaughter  | 2 |
| GalaxyS9            | 2 |
| lawofattraction     | 2 |
| dogecoin            | 2 |
| WhatsInThisThing    | 2 |
| exmormon            | 2 |
| Gotham              | 2 |
| riverdale           | 2 |
| Capitalism          | 2 |
| Madden              | 2 |
| curb                | 2 |
| optometry           | 2 |
| forza               | 2 |
| chicagobulls        | 2 |
| WhyWereTheyFilming  | 2 |
| familyguy           | 2 |
| columbia            | 2 |
| safeorscamvendors   | 2 |
| TheWeeknd           | 2 |
| vegetarian          | 2 |
| geek                | 2 |
| Borderlands         | 2 |
| ilikthebred         | 2 |
| pouya               | 2 |
| Coachella           | 2 |
| slaythespire        | 2 |
| cassetteculture     | 2 |
| hoi4                | 2 |
| Megaten             | 2 |
| NoPoo               | 2 |
| Bombing             | 2 |
| FireEmblemHeroes    | 2 |
| technicallythetruth | 2 |
| wowguilds           | 2 |
| Israel              | 2 |
| freelance           | 2 |
| socialism           | 2 |
| JUSTNOFAMILY        | 2 |
| KarmaRoulette       | 2 |
| ifyoulikeblank      | 2 |
| Connecticut         | 2 |
| MyPeopleNeedMe      | 2 |
| 4Runner             | 2 |
| Acid                | 2 |
| HPPD                | 2 |

|                      |   |
|----------------------|---|
| ModernMagic          | 2 |
| hutcoinsales         | 2 |
| marijuanaenthusiasts | 2 |
| nexus5x              | 2 |
| shittyHDR            | 2 |
| AnimalTextGifs       | 2 |
| McLounge             | 2 |
| cyberpunkgame        | 2 |
| skateboarding        | 2 |
| AskTechnology        | 2 |
| AndroidQuestions     | 2 |
| casualChildAbuse     | 2 |
| rawdenim             | 2 |
| DBZDokkanBattle      | 2 |
| NintendoSwitchDeals  | 2 |
| hitmanimals          | 2 |
| Shoes                | 2 |
| teenrelationships    | 2 |
| siacoin              | 2 |
| grandorder           | 2 |
| StickDoctor          | 2 |
| malegrooming         | 2 |
| classicwow           | 2 |
| thenbhd              | 2 |
| summonerswar         | 2 |
| accidentalswastika   | 2 |
| AerospaceEngineering | 2 |
| IWantToLearn         | 2 |
| exxxchange           | 2 |
| graffhelp            | 2 |
| publix               | 2 |
| aviation             | 2 |
| flashlight           | 2 |
| Thetruthishere       | 2 |
| intrusivethoughts    | 2 |
| playstation          | 2 |
| VinylDeals           | 2 |
| xbox                 | 2 |
| airsoftcirclejerk    | 2 |
| xmrtrader            | 2 |
| moped                | 2 |
| bayarea              | 2 |
| Tronix               | 2 |
| GYM                  | 2 |
| nova                 | 2 |

|                       |   |
|-----------------------|---|
| That70sshow           | 2 |
| pcmods                | 2 |
| Glitch_in_the_Matrix  | 2 |
| BallPythons           | 2 |
| PokemonGoNewJersey    | 2 |
| birdswitharms         | 2 |
| kahoot                | 2 |
| Rhodelsland           | 2 |
| JelBrek               | 2 |
| BoxingStreams         | 2 |
| UnsentLetters         | 2 |
| dokha                 | 2 |
| bertstrips            | 2 |
| GoCommitDie           | 2 |
| Monero                | 2 |
| oneplus               | 2 |
| duolingo              | 2 |
| photomarket           | 2 |
| metaldetecting        | 2 |
| arresteddevelopment   | 2 |
| tennis                | 2 |
| CreditCards           | 2 |
| vagabond              | 2 |
| eden                  | 2 |
| paydaybuilds          | 2 |
| ExNoContact           | 2 |
| furry_irl             | 2 |
| Mabinogi              | 2 |
| indiegameswap         | 2 |
| playrustlfg           | 2 |
| firstworldanarchists  | 2 |
| flatearth             | 2 |
| preppers              | 2 |
| Denver                | 2 |
| POLITIC               | 2 |
| Vape_Sales            | 2 |
| dontyouknowwhoiam     | 2 |
| LILPUMP               | 2 |
| Honda                 | 2 |
| FullScorpion          | 2 |
| mallninjashit         | 2 |
| twentyonepilots       | 2 |
| cssbuy                | 2 |
| piercing              | 2 |
| MoonriseMusicFestival | 2 |



|                       |   |
|-----------------------|---|
| karma                 | 2 |
| soundcloud            | 2 |
| SmallYTChannel        | 2 |
| AnimalsBeingJerks     | 2 |
| MUTCoinSelling        | 2 |
| NoSleepOOC            | 2 |
| legostarwars          | 2 |
| Physics               | 2 |
| quotes                | 2 |
| nothingeverhappens    | 2 |
| feet                  | 2 |
| gambling              | 2 |
| starbucks             | 2 |
| getnarwhal            | 2 |
| DoctorWhumour         | 2 |
| trapproduction        | 2 |
| SubredditSimMeta      | 2 |
| gravityfalls          | 2 |
| TheDepthsBelow        | 2 |
| specializedtools      | 2 |
| Rainmeter             | 2 |
| Shemales              | 2 |
| darkestdungeon        | 2 |
| philosophy            | 2 |
| drugtesthelp          | 2 |
| FortNiteMobile        | 2 |
| RepFashion            | 2 |
| Competitiveoverwatch  | 2 |
| OverwatchLFT          | 2 |
| AnimalCrossing        | 2 |
| misleadingthumbnails  | 2 |
| AlienBlue             | 2 |
| StarVStheForcesofEvil | 2 |
| Monitors              | 2 |
| redditmobile          | 2 |
| dancegavindance       | 2 |
| megalinks             | 2 |
| Weird                 | 2 |
| WorldofTanks          | 2 |
| Supplements           | 2 |
| videography           | 2 |
| Frugal_Jerk           | 2 |
| StockMarket           | 2 |
| OpTicGaming           | 2 |
| Kikpals               | 2 |

|                   |   |
|-------------------|---|
| RBI               | 2 |
| OSU               | 2 |
| TownofSalemgame   | 2 |
| massachusetts     | 2 |
| waifuism          | 2 |
| CalgaryFlames     | 2 |
| TokyoGhoul        | 2 |
| acne              | 2 |
| CarAV             | 2 |
| AmandaEliseLee    | 2 |
| bonnaroo          | 2 |
| modafinil         | 2 |
| creepyasterisks   | 2 |
| pawg              | 2 |
| wifi              | 2 |
| GlitchInTheMatrix | 2 |
| csshelp           | 2 |
| LegitCheck        | 2 |
| Kaiserreich       | 2 |
| FantasyLCS        | 2 |
| raining           | 2 |
| ABoringDystopia   | 2 |
| camping           | 2 |
| caseclickers      | 2 |
| Flights           | 2 |
| snackexchange     | 2 |
| kohi              | 2 |
| woof_irl          | 2 |
| brandnew          | 2 |
| BobsBurgers       | 2 |
| FuckMyShitUp      | 2 |
| EDCexchange       | 2 |
| zelda             | 2 |
| law               | 2 |
| cleanjokes        | 2 |
| Republican        | 2 |
| initiald          | 2 |
| cincinnati        | 2 |
| funhaus           | 2 |
| SWGalaxyOfHeroes  | 2 |
| DJs               | 2 |
| Trufemcels        | 2 |
| scambait          | 2 |
| blackpeoplegifs   | 2 |
| phoneverification | 2 |

|                       |   |
|-----------------------|---|
| police                | 2 |
| stopsmoking           | 2 |
| montageparodies       | 2 |
| southpark             | 2 |
| gpumining             | 2 |
| EnoughInternet        | 2 |
| PoliticalVideo        | 2 |
| spiders               | 2 |
| whatstheword          | 2 |
| 3d6                   | 2 |
| CoDCompPlays          | 2 |
| dishwashers           | 2 |
| MaddenMobileH2H       | 2 |
| catsthegame           | 2 |
| Dachshund             | 2 |
| dishonored            | 2 |
| blip                  | 2 |
| Solving41818          | 2 |
| finance               | 2 |
| excgarated            | 2 |
| APBioNBC              | 2 |
| macdemarco            | 2 |
| MinionHate            | 2 |
| setups                | 2 |
| Diepio                | 2 |
| civ                   | 2 |
| subnautica            | 2 |
| oculus                | 2 |
| myfriendwantstoknow   | 2 |
| theydidthemonstermath | 2 |
| EA_NHL                | 2 |
| jailbreak_            | 2 |
| corgi                 | 2 |
| dogpictures           | 2 |
| whatsthatbook         | 2 |
| TheFrontBottoms       | 2 |
| flightsim             | 2 |
| cowboys               | 2 |
| edmprodcirclejerk     | 2 |
| computerscience       | 2 |
| AmIFreeToGo           | 2 |
| yankees               | 2 |
| fragranceswap         | 2 |
| NetflixBestOf         | 2 |
| SteamAccountsForSale  | 2 |

|                     |   |
|---------------------|---|
| PokemonQuest        | 2 |
| nursing             | 2 |
| AccidentalComedy    | 2 |
| dayzfg              | 2 |
| offwhite            | 2 |
| VapeExchange        | 2 |
| CloneHero           | 2 |
| IdleHeroes          | 2 |
| GTADupe             | 2 |
| Bad_Cop_No_Donut    | 2 |
| netneutrality       | 2 |
| macbookpro          | 2 |
| Welding             | 2 |
| CorporateFacepalm   | 2 |
| lossedsits          | 2 |
| assassinscreed      | 2 |
| AmericanHorrorStory | 2 |
| progun              | 2 |
| PSVR                | 2 |
| FortniteLeaks       | 2 |
| SpotifyPlaylists    | 2 |
| californication     | 2 |
| DynastyFF           | 2 |
| trippy              | 2 |
| curledfeetsies      | 2 |
| melodichardcore     | 2 |
| crypto              | 2 |
| suggestmeabook      | 2 |
| alexandradaddario   | 2 |
| TeamFourStar        | 2 |
| skimboarding        | 2 |
| ebikes              | 2 |
| dankchristianmemes  | 2 |
| TrueSTL             | 2 |
| SeaList             | 2 |
| Neverbrokeabone     | 2 |
| roblox              | 2 |
| MCSXbox             | 2 |
| LGBTeensGoneMild    | 2 |
| KingdomHearts       | 2 |
| FortnitePhotography | 2 |
| EvelynnMains        | 2 |
| mtgtrades           | 2 |
| fatlogic            | 2 |
| StLouis             | 2 |

|                     |   |
|---------------------|---|
| EdgyMemes           | 2 |
| marvelmemes         | 2 |
| TheArmory           | 2 |
| LearnUselessTalents | 2 |
| fashion             | 2 |
| NewYorkMets         | 2 |
| N8theGr8            | 2 |
| virtualreality      | 2 |
| Cinema4D            | 2 |
| VapeRequests        | 2 |
| coaxedintoasnafu    | 2 |
| sysadmin            | 2 |
| PokeMoonSun         | 2 |
| FinalFantasy        | 2 |
| hamiltonmusical     | 2 |
| sticker             | 2 |
| gundeals            | 2 |
| CommentKarma4Free   | 2 |
| 3amjokes            | 2 |
| privacy             | 2 |
| ARK                 | 2 |
| tuckedinkitties     | 2 |
| XboxGameSharing     | 2 |
| Charity             | 2 |
| linuxmasterrace     | 2 |
| insomnia            | 2 |
| YouTube_startups    | 2 |
| GTAGivers           | 2 |
| AteTheOnion         | 2 |
| ArchitecturePorn    | 2 |
| furry               | 2 |
| Drifting            | 2 |
| blues               | 2 |
| homelab             | 2 |
| BillBurr            | 2 |
| ANormalDayInRussia  | 2 |
| vape_memes          | 2 |
| GifRecipes          | 2 |
| skyrimmods          | 2 |
| Scrubs              | 2 |
| Swimming            | 2 |
| PleX                | 2 |
| Planetside          | 2 |
| germany             | 1 |
| ImaginaryLandscapes | 1 |

|                        |   |
|------------------------|---|
| CarnivalCruiseFans     | 1 |
| u_petropolis96         | 1 |
| classic4chan           | 1 |
| matt                   | 1 |
| Laptop                 | 1 |
| SonyVegas              | 1 |
| predator               | 1 |
| exredpill              | 1 |
| groestlcoin            | 1 |
| 350z                   | 1 |
| Gloup                  | 1 |
| FlyingStudents         | 1 |
| chemistryhelp          | 1 |
| nfsnolimits            | 1 |
| LastShadow             | 1 |
| HecklerKoch            | 1 |
| joyetechlogos          | 1 |
| WhatSoNot              | 1 |
| codeine                | 1 |
| SuicideBoys            | 1 |
| PhonesAreBad           | 1 |
| moderatelyinteresting  | 1 |
| MildlyVandalised       | 1 |
| theislandsfnyne        | 1 |
| bluetongueskinks       | 1 |
| INJUSTICE              | 1 |
| reptiles               | 1 |
| u_pm_me_all_ur_pelfies | 1 |
| BlackDevinDomination   | 1 |
| GarlicMarket           | 1 |
| ketorecipes            | 1 |
| CelebrityButts         | 1 |
| Marvel_Movies          | 1 |
| AZCardinals            | 1 |
| flexweak               | 1 |
| Hallmarks              | 1 |
| a7x                    | 1 |
| chiari                 | 1 |
| testmybot              | 1 |
| beetle                 | 1 |
| AatroxMains            | 1 |
| dadhadwant             | 1 |
| C25K                   | 1 |
| siberianhusky          | 1 |
| jacksonville           | 1 |

|                    |   |
|--------------------|---|
| CasualUK           | 1 |
| VHS                | 1 |
| sadcomics          | 1 |
| milf               | 1 |
| Billions           | 1 |
| robbery            | 1 |
| ihadastroke        | 1 |
| scienceofdeduction | 1 |
| CannabisRoad       | 1 |
| Gamecocks          | 1 |
| u_SPBIDs           | 1 |
| FacialFun          | 1 |
| BackYardChickens   | 1 |
| unpopular          | 1 |
| BlackLivesMatter   | 1 |
| nvcc               | 1 |
| subbie             | 1 |
| PinnaclePro        | 1 |
| pond               | 1 |
| yuri               | 1 |
| DoomWadStation     | 1 |
| Salvia             | 1 |
| PERSoNA            | 1 |
| Nationals          | 1 |
| playpostknight     | 1 |
| letscompose        | 1 |
| weedstocks         | 1 |
| MemoryDefrag       | 1 |
| brokengifs         | 1 |
| FlarrowPorn        | 1 |
| curlyhair          | 1 |
| stripe             | 1 |
| WaxPens            | 1 |
| SnapchatArt        | 1 |
| Animesuggest       | 1 |
| MCPE               | 1 |
| Tiresaretheenemy   | 1 |
| architecture       | 1 |
| EmmaWatson         | 1 |
| F13thegame         | 1 |
| CoilGore           | 1 |
| LeagueofFailures   | 1 |
| Skookum            | 1 |
| cad                | 1 |
| nsfw_wtf           | 1 |

|                     |   |
|---------------------|---|
| ced                 | 1 |
| solotravel          | 1 |
| 7daystodie          | 1 |
| funrun              | 1 |
| Gemini              | 1 |
| KenM                | 1 |
| ekkomains           | 1 |
| cosplaygirls        | 1 |
| felly               | 1 |
| u_NebEdits          | 1 |
| RBA                 | 1 |
| DontFundMe          | 1 |
| MonsterHunterWorld  | 1 |
| Epilepsy            | 1 |
| InvestmentClub      | 1 |
| migraine            | 1 |
| theapplehub         | 1 |
| hawks               | 1 |
| treecaching         | 1 |
| karthusmains        | 1 |
| u_codeineplug       | 1 |
| u_JuulFiene         | 1 |
| sync_ios            | 1 |
| Justridingalong     | 1 |
| JediDouche          | 1 |
| gorillaz            | 1 |
| passionx            | 1 |
| GiantCesspool       | 1 |
| IDontWorkHereLady   | 1 |
| OsuSkins            | 1 |
| ShingekiNoKyojin    | 1 |
| pewdiepie           | 1 |
| ww2                 | 1 |
| ShrugLifeSyndicate  | 1 |
| Clairvoyantreadings | 1 |
| SamONellaAcademy    | 1 |
| Kava                | 1 |
| angelsbaseball      | 1 |
| punchableface       | 1 |
| youtubesyllables    | 1 |
| antivirus           | 1 |
| music_like_this     | 1 |
| computerhelp        | 1 |
| FindTheSniper       | 1 |
| vaporizer           | 1 |



|                      |   |
|----------------------|---|
| showerbeer           | 1 |
| japancirclejerk      | 1 |
| Demonoid             | 1 |
| u_Doppelttime        | 1 |
| residentevil         | 1 |
| Empaths              | 1 |
| u_bighammer88        | 1 |
| BreedingDittos       | 1 |
| frogs                | 1 |
| u_weihaomeva         | 1 |
| riddles              | 1 |
| Internet_Box         | 1 |
| etherium             | 1 |
| Guildwars2           | 1 |
| teenmom              | 1 |
| LorienLegacies       | 1 |
| LittleBritt          | 1 |
| unt                  | 1 |
| waterpolo            | 1 |
| Beartooth            | 1 |
| traps                | 1 |
| MTB                  | 1 |
| net_neutrality       | 1 |
| encryption           | 1 |
| LiverpoolFC          | 1 |
| IncelTears           | 1 |
| community            | 1 |
| ImaginaryColorscapes | 1 |
| BeautyBoxes          | 1 |
| bbuk                 | 1 |
| LEDgrow              | 1 |
| hansenvspredator     | 1 |
| Colby                | 1 |
| RateMyNudeBody       | 1 |
| Wrangler             | 1 |
| IKEA                 | 1 |
| Za_Naito             | 1 |
| WTFhumor             | 1 |
| SuperShibe           | 1 |
| PipeTobacco          | 1 |
| needadvice           | 1 |
| steak                | 1 |
| schizoaffective      | 1 |
| trainhopping         | 1 |
| Oldschool_Runescape  | 1 |

|                     |   |
|---------------------|---|
| MarioTennis         | 1 |
| geekbonersNSFW      | 1 |
| u_Lyellae           | 1 |
| forgery             | 1 |
| CombatFootage       | 1 |
| UnexpectedDDLC      | 1 |
| IggyAzaleasAss      | 1 |
| kfeets              | 1 |
| MarchAgainstTrump   | 1 |
| Winnipeg            | 1 |
| AutoDetailing       | 1 |
| blackbookgraffiti   | 1 |
| tulsa               | 1 |
| u_watchursix        | 1 |
| mountaindeu         | 1 |
| htc                 | 1 |
| transgencirclejerk  | 1 |
| tommos              | 1 |
| tails               | 1 |
| Maya                | 1 |
| Snubbies            | 1 |
| CYBERPOWERPC        | 1 |
| IsolatedVocals      | 1 |
| ImHigh              | 1 |
| atheistmemes        | 1 |
| vndevs              | 1 |
| iofferandaliexpress | 1 |
| drawing             | 1 |
| typo                | 1 |
| Sup                 | 1 |
| ShowerGoon          | 1 |
| islam               | 1 |
| voetbalnieuws       | 1 |
| garlicstore         | 1 |
| RobinhoodReferral   | 1 |
| SanMarcosCA         | 1 |
| churchofroyalplayer | 1 |
| CompetitiveWoW      | 1 |
| BreadStapledToTrees | 1 |
| RemasterMotD        | 1 |
| ypppppppppppp       | 1 |
| vlonc               | 1 |
| GoogleAnalytics     | 1 |
| RoyaleRecruit       | 1 |
| LaserDisc           | 1 |

|                      |   |
|----------------------|---|
| penguin              | 1 |
| TheExpanse           | 1 |
| alcoholism           | 1 |
| rubyonrails          | 1 |
| Sprint               | 1 |
| noice                | 1 |
| MailMonday           | 1 |
| rccars               | 1 |
| SNLirl               | 1 |
| HelloInternet        | 1 |
| fragrancecirclejerk  | 1 |
| u_imguralbumbot      | 1 |
| sexygirls            | 1 |
| bourbon              | 1 |
| HeroesandGenerals    | 1 |
| HomeServer           | 1 |
| animenocontext       | 1 |
| Dodgers              | 1 |
| JoeyDiaz             | 1 |
| SneakyBackgroundFeet | 1 |
| gwent                | 1 |
| EricSneakers         | 1 |
| TotesMessenger       | 1 |
| patientgamers        | 1 |
| skycoin              | 1 |
| DeliciousTraps       | 1 |
| EndlessLegend        | 1 |
| GTAMarket            | 1 |
| santacruzlocals      | 1 |
| vintagecomputing     | 1 |
| jewelry              | 1 |
| NFA                  | 1 |
| whiskey              | 1 |
| ShakeAndVape         | 1 |
| percussion           | 1 |
| emetophobia          | 1 |
| facebookwins         | 1 |
| amishadowbanned      | 1 |
| ents                 | 1 |
| askreddt             | 1 |
| secretsanta          | 1 |
| Glitchhop            | 1 |
| NikkiBenz            | 1 |
| NeutralPolitics      | 1 |
| luciomains           | 1 |

|                      |   |
|----------------------|---|
| vivaldibrowser       | 1 |
| SteamHeads           | 1 |
| ChristianGirls       | 1 |
| feckingbirds         | 1 |
| BeardedDragons       | 1 |
| PKRepsCommunity      | 1 |
| stevenuniverse       | 1 |
| AskGames             | 1 |
| SoccerBetting        | 1 |
| bowlingforsoup       | 1 |
| lggwatch             | 1 |
| AskMeddit            | 1 |
| DallasFuel           | 1 |
| chemicalreactiongifs | 1 |
| qotsa                | 1 |
| boltedontits         | 1 |
| hiking               | 1 |
| GamingRoomSetups     | 1 |
| Animoments           | 1 |
| Quinnipiac           | 1 |
| kpopfap              | 1 |
| MyCherryCrush        | 1 |
| CaseClickerTrades    | 1 |
| ReversedGIFS         | 1 |
| me_ira               | 1 |
| daddit               | 1 |
| scholarships         | 1 |
| Nimiq                | 1 |
| VinylCollectors      | 1 |
| relaxedpokemontrades | 1 |
| Pins4Skins           | 1 |
| ThreadKillers        | 1 |
| northcounty          | 1 |
| u_Nilpatel7          | 1 |
| DIY_eJuice_Help      | 1 |
| ByteBall             | 1 |
| omise_go             | 1 |
| WedgieGirls          | 1 |
| HaveWeMet            | 1 |
| 30ROCK               | 1 |
| fny                  | 1 |
| HongKong             | 1 |
| CollegeTransfer      | 1 |
| Gnostic              | 1 |
| Sinemia              | 1 |

|                      |   |
|----------------------|---|
| OpenEmu              | 1 |
| abandoned            | 1 |
| actuallesbians       | 1 |
| weightroom           | 1 |
| Safeway              | 1 |
| shitpost             | 1 |
| Nexus5               | 1 |
| FRC                  | 1 |
| redacted             | 1 |
| Fantasy              | 1 |
| Habits               | 1 |
| intermittentfasting  | 1 |
| Roast_Me             | 1 |
| mildhighclub         | 1 |
| yappy                | 1 |
| FriendshipAdvice     | 1 |
| MLBStreams           | 1 |
| france               | 1 |
| StudentNurse         | 1 |
| hardwaregore         | 1 |
| BeatMarket           | 1 |
| Psychic              | 1 |
| canon                | 1 |
| DesignMyRoom         | 1 |
| wholesomegreentext   | 1 |
| Militaryfaq          | 1 |
| tressless            | 1 |
| Slackline            | 1 |
| fizzmains            | 1 |
| tinytower            | 1 |
| shockwaveporn        | 1 |
| Barcelona            | 1 |
| TRADE                | 1 |
| forsale              | 1 |
| Tennessee            | 1 |
| prisonarchitect      | 1 |
| pokemongotrades      | 1 |
| altima               | 1 |
| basketballshorts_CSS | 1 |
| BBW_Chubby           | 1 |
| COMPLETEANARCHY      | 1 |
| NoJumper             | 1 |
| adhd_anxiety         | 1 |
| HSTrack              | 1 |
| noshitouija          | 1 |

|                     |   |
|---------------------|---|
| Needafriend         | 1 |
| AbyssRium           | 1 |
| osheaga             | 1 |
| toyexchange         | 1 |
| AppleMusic          | 1 |
| okc                 | 1 |
| bodyweightfitness   | 1 |
| CrappyDesign2       | 1 |
| Pokemongiveaway     | 1 |
| Porsche             | 1 |
| MilSim              | 1 |
| playhitbox          | 1 |
| amibeingdetained    | 1 |
| computerviruses     | 1 |
| VRchat              | 1 |
| vermont             | 1 |
| design_critiques    | 1 |
| gradadmissions      | 1 |
| simracing           | 1 |
| sadmusic            | 1 |
| raimimemes          | 1 |
| Animewallpaper      | 1 |
| nashville           | 1 |
| poker               | 1 |
| SFShock_OW          | 1 |
| chronotrigger       | 1 |
| pokemongobotting    | 1 |
| Achievement_Hunter  | 1 |
| Ballers             | 1 |
| MMORPG              | 1 |
| netorare            | 1 |
| ps4homebrew         | 1 |
| Breckenridge        | 1 |
| sweepstakes         | 1 |
| southafrica         | 1 |
| medlabprofessionals | 1 |
| unexpectedjihad     | 1 |
| Feminization        | 1 |
| ColoradoRockies     | 1 |
| BuzzFeedUnsolved    | 1 |
| Bluzelle            | 1 |
| Objectivism         | 1 |
| test                | 1 |
| ShittyVeganFoodPorn | 1 |
| greysanatomy        | 1 |

|                       |   |
|-----------------------|---|
| Michigan              | 1 |
| neocities             | 1 |
| Holly_Peers           | 1 |
| Naturalhair           | 1 |
| Undertale             | 1 |
| GamerPals             | 1 |
| InterdimensionalCable | 1 |
| ShaneDawson           | 1 |
| 2cb                   | 1 |
| Testingformodstuff    | 1 |
| imdbvg                | 1 |
| MagicArena            | 1 |
| notlikeothergirls     | 1 |
| northernlion          | 1 |
| reddeadredemption     | 1 |
| FortniteFleaMarket    | 1 |
| karmawhore            | 1 |
| ramen                 | 1 |
| timelapse             | 1 |
| fashionsouls          | 1 |
| dank_memes_archive    | 1 |
| needforspeed          | 1 |
| darksoulspvp          | 1 |
| badkarma              | 1 |
| homemadexxx           | 1 |
| gamecollecting        | 1 |
| LogHorizon            | 1 |
| MusicWorldTradeCenter | 1 |
| hmm                   | 1 |
| NintendoMemes         | 1 |
| u_BoomXhakaLacaa      | 1 |
| hyptoheicla           | 1 |
| Audi                  | 1 |
| medicine              | 1 |
| RATS                  | 1 |
| PumpItUp              | 1 |
| JailbreakSwap         | 1 |
| clusterheads          | 1 |
| mattcolville          | 1 |
| HeadphoneAdvice       | 1 |
| FindAUnit             | 1 |
| steamboat             | 1 |
| TropicalWeather       | 1 |
| legaladviceofftopic   | 1 |
| TransyTalk            | 1 |

|                    |   |
|--------------------|---|
| ufc                | 1 |
| clicksforbeermoney | 1 |
| philmont           | 1 |
| avb                | 1 |
| VASSAL             | 1 |
| abv                | 1 |
| BloonsTDBattles    | 1 |
| thebuttontheories  | 1 |
| liltracy           | 1 |
| MatthewTellis      | 1 |
| moviescirclejerk   | 1 |
| snowboardingnoobs  | 1 |
| u_smoke_man        | 1 |
| AskMenAdvice       | 1 |
| PCSX2              | 1 |
| AMG                | 1 |
| 23andme            | 1 |
| OTMemes            | 1 |
| USC                | 1 |
| Dreadlocks         | 1 |
| SkrillexDev        | 1 |
| Tippmann_airsoft   | 1 |
| ElectroBOOM        | 1 |
| Referral           | 1 |
| LRPresetSharePlace | 1 |
| ClassicalMemes     | 1 |
| Cornell            | 1 |
| Innokin            | 1 |
| outlast            | 1 |
| upvoteexeggutor    | 1 |
| LodedDiper         | 1 |
| Eragon             | 1 |
| DIYclassifieds     | 1 |
| peasants           | 1 |
| ClothedTitfuck     | 1 |
| filmmakinghs       | 1 |
| NBA2KDesign        | 1 |
| oddlyterrifying    | 1 |
| NBA2kTeamUp        | 1 |
| u_phasedkitten     | 1 |
| techtheatre        | 1 |
| humblebrag         | 1 |
| OctobersVeryOwn    | 1 |
| gonewildstories    | 1 |
| dirtysmall         | 1 |



|                    |   |
|--------------------|---|
| ledgerwallet       | 1 |
| SFWporn            | 1 |
| ModelUSGov         | 1 |
| 18_19              | 1 |
| leopardgeckos      | 1 |
| Substratum         | 1 |
| musclecar          | 1 |
| Dota2Trade         | 1 |
| gamegrups          | 1 |
| firstaid           | 1 |
| bootlegmtg         | 1 |
| javascript         | 1 |
| transvoice         | 1 |
| TankPorn           | 1 |
| wrongnumber        | 1 |
| mgmt               | 1 |
| Gangstalking       | 1 |
| sociopath          | 1 |
| BassCanyon         | 1 |
| Electrum           | 1 |
| BitchImATrain      | 1 |
| clevelandcavs      | 1 |
| noah               | 1 |
| kicksmarket        | 1 |
| Shroud             | 1 |
| SydneySierota      | 1 |
| CopOrNot           | 1 |
| RisingStorm2       | 1 |
| hackernews         | 1 |
| timberapp          | 1 |
| Schizotypal        | 1 |
| GravesMains        | 1 |
| EverWing           | 1 |
| inthenews          | 1 |
| Overgrowth         | 1 |
| Aleague            | 1 |
| CroppedNorrisJokes | 1 |
| lgg6               | 1 |
| Urbex              | 1 |
| sleeptrain         | 1 |
| 98Rock             | 1 |
| things             | 1 |
| tomorrow           | 1 |
| blender            | 1 |
| spikes             | 1 |

|                       |   |
|-----------------------|---|
| LinusTechTips         | 1 |
| INeedAName            | 1 |
| telltale              | 1 |
| PlayOn                | 1 |
| BeamNG                | 1 |
| futurebeats           | 1 |
| Periods               | 1 |
| policeporn            | 1 |
| KatowiceTrading       | 1 |
| ender3                | 1 |
| india                 | 1 |
| PentucketHappenings   | 1 |
| limerence             | 1 |
| AsianCumsluts         | 1 |
| LaptopDeals           | 1 |
| ecr_es                | 1 |
| vine                  | 1 |
| The_Crew              | 1 |
| FUTMobile             | 1 |
| ecycle                | 1 |
| newburyport           | 1 |
| DenverBroncos         | 1 |
| Marquette             | 1 |
| SDSU                  | 1 |
| IsThatCUM             | 1 |
| FocusST               | 1 |
| poshmark              | 1 |
| nba_2k17              | 1 |
| minnesotavikings      | 1 |
| AmandaCerny           | 1 |
| vitahacks             | 1 |
| u_noemiecc            | 1 |
| GOtrades              | 1 |
| rustfactions          | 1 |
| Wolfenstein           | 1 |
| basketballjerseys     | 1 |
| vexillology           | 1 |
| simpsonswave          | 1 |
| Microcenterproxy      | 1 |
| woosh                 | 1 |
| DanmachiMemoriaFreeze | 1 |
| BoostLife             | 1 |
| themastersschool      | 1 |
| OCPoetry              | 1 |
| boatbuilding          | 1 |

|                       |   |
|-----------------------|---|
| WhatsWrongWithYourCat | 1 |
| menwritingwomen       | 1 |
| poop                  | 1 |
| lorde                 | 1 |
| Colorado              | 1 |
| gmu                   | 1 |
| PaintballBST          | 1 |
| Beer_Money            | 1 |
| Vent                  | 1 |
| LOLStreams            | 1 |
| EatCheapAndHealthy    | 1 |
| DevilMayCry           | 1 |
| policeuk              | 1 |
| Forex                 | 1 |
| blackchickswhtedicks  | 1 |
| virginvschad          | 1 |
| ShittyTodayILearned   | 1 |
| JustUnsubbed          | 1 |
| gank                  | 1 |
| iOS12                 | 1 |
| historyteachers       | 1 |
| CLOUDS                | 1 |
| onceheroes            | 1 |
| RandomActsOfMuffDive  | 1 |
| GoogleMaps            | 1 |
| SmiteLFM              | 1 |
| u_NaClDaddy           | 1 |
| NameMyCSGOItem        | 1 |
| SurrealApprovals      | 1 |
| WondersOfChina        | 1 |
| whitesox              | 1 |
| wowraf                | 1 |
| AutoNewspaper         | 1 |
| iPhone8               | 1 |
| PokemonPlaza          | 1 |
| DestinyGaymers        | 1 |
| note8                 | 1 |
| GolfClash             | 1 |
| shortfinal            | 1 |
| CrackStatus           | 1 |
| SmiteTrades           | 1 |
| DatV                  | 1 |
| celeb_redheads        | 1 |
| cryptomarket          | 1 |
| DarkWebLinks          | 1 |

|                     |   |
|---------------------|---|
| Domains             | 1 |
| leangains           | 1 |
| phillies            | 1 |
| PredictMe           | 1 |
| comicbookcollecting | 1 |
| fakealbumcovers     | 1 |
| weirdwikihow        | 1 |
| TooMeIrlForMeIrl    | 1 |
| Defenders           | 1 |
| powerlifting        | 1 |
| Fiveheads           | 1 |
| 7kglobal            | 1 |
| unethicallifehacks  | 1 |
| ExpandDong          | 1 |
| barstoolsports      | 1 |
| SocialMedialsCancer | 1 |
| Bandnames           | 1 |
| Summer              | 1 |
| hondaprelude        | 1 |
| Dallas              | 1 |
| hiphop101           | 1 |
| ParaPots            | 1 |
| Hype                | 1 |
| SmokerHate          | 1 |
| EthereumClassic     | 1 |
| pokemonrmt          | 1 |
| StopSpeeding        | 1 |
| whothefuckup        | 1 |
| Thrifty             | 1 |
| Droplet_coin        | 1 |
| storj               | 1 |
| TEOTFW              | 1 |
| Homeplate           | 1 |
| usu                 | 1 |
| u_station_nine      | 1 |
| animation           | 1 |
| tvshow              | 1 |
| iOSsetups           | 1 |
| tucker_carlson      | 1 |
| PropagandaPosters   | 1 |
| dogs                | 1 |
| 13ReasonsWhy        | 1 |
| PrintedMinis        | 1 |
| pussy               | 1 |
| DreamInterpretation | 1 |

|                   |   |
|-------------------|---|
| GreekMythology    | 1 |
| collapse          | 1 |
| Torontobluejays   | 1 |
| LinkinPark        | 1 |
| Vindictus         | 1 |
| TestSubReddit_    | 1 |
| pussypassdenied   | 1 |
| GPGpractice       | 1 |
| Llents            | 1 |
| identifythisfont  | 1 |
| adventuretime     | 1 |
| MoneroMining      | 1 |
| roswell           | 1 |
| Lightbulb         | 1 |
| amateur_boxing    | 1 |
| zillakami         | 1 |
| kybernetwork      | 1 |
| LegitChecker      | 1 |
| redditdev         | 1 |
| Acceleracers      | 1 |
| UnexpectedJoJo    | 1 |
| petpeeve          | 1 |
| S2000             | 1 |
| Inventit          | 1 |
| SouthLakesHS      | 1 |
| Sovereignty       | 1 |
| lastimages        | 1 |
| Foodforthought    | 1 |
| Nexomon           | 1 |
| warwickmains      | 1 |
| Craigslist_Cars   | 1 |
| powersaves3ds     | 1 |
| overcominggravity | 1 |
| cryptography      | 1 |
| pencils           | 1 |
| splatoon          | 1 |
| jetblue           | 1 |
| CricketWireless   | 1 |
| funkoswap         | 1 |
| syriancivilwar    | 1 |
| LilYachty         | 1 |
| holdmyfeedingtube | 1 |
| ecig_vendors      | 1 |
| AskingAlexandria  | 1 |
| uBlockOrigin      | 1 |

|                     |   |
|---------------------|---|
| Portlandia          | 1 |
| DetectiveConan      | 1 |
| opiates_gonewild    | 1 |
| pcpartpickerbuilds  | 1 |
| 52book              | 1 |
| PVBand              | 1 |
| S7Edge              | 1 |
| DIYELIQUIDRECIPES   | 1 |
| doggos              | 1 |
| StardustCrusaders   | 1 |
| cymbals             | 1 |
| CrossView           | 1 |
| Chevrolet           | 1 |
| dailydabbers        | 1 |
| FUCKDAVIDKING       | 1 |
| rapbattles          | 1 |
| EarthlingPorn       | 1 |
| piercetheveil       | 1 |
| DXMMusic            | 1 |
| dubstep             | 1 |
| KithNYC             | 1 |
| BulkOrCut           | 1 |
| problemgambling     | 1 |
| NikolasCruz         | 1 |
| earshit             | 1 |
| StuffOnCats         | 1 |
| Kendra_Sunderland   | 1 |
| MUTTalk             | 1 |
| sexover30           | 1 |
| cinci_pokemon_go    | 1 |
| thingsapp           | 1 |
| BayAreaEnts         | 1 |
| ChronicPain         | 1 |
| LigaMX              | 1 |
| Rapekink            | 1 |
| StarWarsForceArena  | 1 |
| xymoxcirclejerk     | 1 |
| showertoughts       | 1 |
| FullShrimp          | 1 |
| ComputerEngineering | 1 |
| askmedicine         | 1 |
| scamming            | 1 |
| RedditSilverRobot   | 1 |
| needamod            | 1 |
| phoneswap           | 1 |

|                     |   |
|---------------------|---|
| lockpicking         | 1 |
| TombRaider          | 1 |
| Shittyaskflying     | 1 |
| Epicduck            | 1 |
| Gonewild18          | 1 |
| helloicon           | 1 |
| Infographics        | 1 |
| nyctreess           | 1 |
| olemiss             | 1 |
| ourgratitudejournal | 1 |
| MeetNewPeopleHere   | 1 |
| PLC                 | 1 |
| HomeImprovement     | 1 |
| coolguides          | 1 |
| PartyParrot         | 1 |
| Freeform            | 1 |
| johannesburg        | 1 |
| XVcrosstrek         | 1 |
| Guilt               | 1 |
| pueblo              | 1 |
| gokarts             | 1 |
| Megumin             | 1 |
| AppleWhatShouldIBuy | 1 |
| guessmyage          | 1 |
| delusionalartists   | 1 |
| FitFI               | 1 |
| askportland         | 1 |
| dyinglight          | 1 |
| SVU                 | 1 |
| Kanye_2             | 1 |
| horror              | 1 |
| ualbany             | 1 |
| FIFA17UT            | 1 |
| drugcirclejerk      | 1 |
| ecommerce           | 1 |
| PlantedTank         | 1 |
| environment         | 1 |
| PixelStarships      | 1 |
| VideoEditing        | 1 |
| newhaven            | 1 |
| dogswearinghats     | 1 |
| PatriotsvLionStream | 1 |
| americanfootball    | 1 |
| fetish              | 1 |
| twerking            | 1 |

|                       |   |
|-----------------------|---|
| bindingofisaacseeds   | 1 |
| YungLean              | 1 |
| ReelToReel            | 1 |
| EngineeringPorn       | 1 |
| writingprompt         | 1 |
| WWE                   | 1 |
| Keto_Food             | 1 |
| gethightothis         | 1 |
| PornGifs              | 1 |
| StoriesFromYourSchool | 1 |
| omegle                | 1 |
| latterdaysaints       | 1 |
| cosmoandwanda         | 1 |
| sighthounds           | 1 |
| Proxysitelists        | 1 |
| TheRustyToaster       | 1 |
| ArtPorn               | 1 |
| kravmaga              | 1 |
| vail                  | 1 |
| RiftForSale           | 1 |
| usedsocks             | 1 |
| IOTAFaucet            | 1 |
| gentlefemdom          | 1 |
| UpvotedBecauseMeeseek | 1 |
| PurplePillDebate      | 1 |
| SparrowXXX            | 1 |
| MovieSuggestions      | 1 |
| MonarchButterfly      | 1 |
| qdoba                 | 1 |
| sneakpeekbot          | 1 |
| galiomains            | 1 |
| logorequests          | 1 |
| u_Trek1812            | 1 |
| SnooRequest           | 1 |
| fullmoviesongoogle    | 1 |
| nationalguard         | 1 |
| HearthstoneMexico     | 1 |
| Lil_uzi_vert          | 1 |
| wherewasthistaken     | 1 |
| learnmath             | 1 |
| MumkeysAnimeReviews   | 1 |
| BenedictCumberbatch   | 1 |
| FortniteXbox          | 1 |
| sanfrancisco          | 1 |
| ballpython            | 1 |



|                      |   |
|----------------------|---|
| Gamecube             | 1 |
| TrueFMK              | 1 |
| JuulMiddleMen        | 1 |
| TalesFromAdultStores | 1 |
| FancyFollicles       | 1 |
| Roku                 | 1 |
| chrome               | 1 |
| Cod4Remastered       | 1 |
| Scotland             | 1 |
| AnthemTheGame        | 1 |
| tgn8r                | 1 |
| CrackWatch           | 1 |
| deathgrips           | 1 |
| fappeningdiscussion  | 1 |
| ToolBand             | 1 |
| KLCherokee           | 1 |
| FairfieldPrep        | 1 |
| 8tbEasystore         | 1 |
| ATC                  | 1 |
| TampaBayLightning    | 1 |
| pokemongodev         | 1 |
| pocketoperators      | 1 |
| OITNB                | 1 |
| shia                 | 1 |
| vostok               | 1 |
| porterrobinson       | 1 |
| TheBarbarianClan     | 1 |
| diyaudio             | 1 |
| merchantthegame      | 1 |
| KassadinMains        | 1 |
| Nsfw_Haiku           | 1 |
| goldenretrievers     | 1 |
| HondaCB              | 1 |
| ChicoCA              | 1 |
| Chubbs               | 1 |
| scoliosis            | 1 |
| NHLStreams           | 1 |
| bermuda              | 1 |
| Ouija                | 1 |
| Ferrari              | 1 |
| PromoteYourMusic     | 1 |
| KGATLW               | 1 |
| TheNewRight          | 1 |
| WildStar             | 1 |
| MarvelStrikeForce    | 1 |

|                      |   |
|----------------------|---|
| Slitherio            | 1 |
| airguns              | 1 |
| PurseIO              | 1 |
| HunterXHunter        | 1 |
| BobbyandtheBluejays  | 1 |
| SecurityAnalysis     | 1 |
| predictit            | 1 |
| 2b2t                 | 1 |
| GarrysMod            | 1 |
| shower_thoughts      | 1 |
| whatbugisthis        | 1 |
| Nightmares           | 1 |
| Thighs               | 1 |
| BeMeApp              | 1 |
| mildypenis           | 1 |
| orlando              | 1 |
| JETWaterPipes        | 1 |
| KissAnime            | 1 |
| Frisson              | 1 |
| TABG                 | 1 |
| BenignExistence      | 1 |
| pkmntcpreferences    | 1 |
| reddits              | 1 |
| cuddlebuddies        | 1 |
| WRX                  | 1 |
| SUBREDDITNAME        | 1 |
| shittylifehacks      | 1 |
| thatsthejoke         | 1 |
| ZonaEnts             | 1 |
| makingmoney          | 1 |
| ImagesOfMinnesota    | 1 |
| Shroom               | 1 |
| StudentLoans         | 1 |
| microphones          | 1 |
| modsarehomosexual    | 1 |
| EasonyesSneakers     | 1 |
| Hotchickswithtattoos | 1 |
| Wellworn             | 1 |
| futurebass           | 1 |
| PsilocybinMushrooms  | 1 |
| chillstep            | 1 |
| cripplingalcoholism  | 1 |
| killthecameraman     | 1 |
| photoshop            | 1 |
| Vaingloryguildhall   | 1 |

|                       |   |
|-----------------------|---|
| vintageaudio          | 1 |
| webmarketing          | 1 |
| u_GalPolBlue          | 1 |
| ketodrunk             | 1 |
| Advance_Wars          | 1 |
| nohomo                | 1 |
| Shortfilms            | 1 |
| ShittyCarMod          | 1 |
| kotk                  | 1 |
| moralorel             | 1 |
| cryptofit             | 1 |
| HistoryPorn           | 1 |
| WildernessBackpacking | 1 |
| tameimpalacirclejerk  | 1 |
| rpdrgringe            | 1 |
| TameImpala            | 1 |
| aoe2                  | 1 |
| SheikMains            | 1 |
| NYKnicks              | 1 |
| The_Dennis            | 1 |
| videogames            | 1 |
| knifecringe           | 1 |
| osugame               | 1 |
| DuelLinks             | 1 |
| 6ix9ine               | 1 |
| ENFP                  | 1 |
| thedonald             | 1 |
| ResearchSourcing      | 1 |
| beer                  | 1 |
| subway                | 1 |
| PMOfreeTeens          | 1 |
| LOLscrim              | 1 |
| psychadelics          | 1 |
| scuba                 | 1 |
| iPAHub                | 1 |
| Vapistan              | 1 |
| cloudygamer           | 1 |
| redditgetsscribed     | 1 |
| LeafyIsHere           | 1 |
| eliaszjm              | 1 |
| DeadBedrooms          | 1 |
| awwcoholics           | 1 |
| asl                   | 1 |
| infp                  | 1 |
| diabetes_t1           | 1 |

|                       |   |
|-----------------------|---|
| sharpobjects          | 1 |
| Vapers_GoneWild       | 1 |
| GuildWars             | 1 |
| PhillyUnion           | 1 |
| Homebrewing           | 1 |
| FortniteAfterDark     | 1 |
| EDMProductionTeam     | 1 |
| crappymusic           | 1 |
| UniversalOrlando      | 1 |
| PSP                   | 1 |
| MECoOp                | 1 |
| CreepyPastas          | 1 |
| RetroArch             | 1 |
| bikerace              | 1 |
| electronic_circuits   | 1 |
| badMovies             | 1 |
| seniorkitties         | 1 |
| Incelfies             | 1 |
| PinkOmega             | 1 |
| Jetpackfighter        | 1 |
| SteamBegging          | 1 |
| NarcissisticAbuse     | 1 |
| ParkCity              | 1 |
| u_Titobanana          | 1 |
| volleyball            | 1 |
| tf2trade              | 1 |
| totallylooklike       | 1 |
| PokemonTCG            | 1 |
| NZXT                  | 1 |
| cloudmining           | 1 |
| UnreleasedSongs       | 1 |
| csusm                 | 1 |
| lakers                | 1 |
| CSUC                  | 1 |
| AverageBattlestations | 1 |
| Overwatch_Memes       | 1 |
| cicada                | 1 |
| gofundme              | 1 |
| SpotifyPlaylistShare  | 1 |
| StardewValley         | 1 |
| breastfeeding         | 1 |
| thalassaphobia        | 1 |
| occult                | 1 |
| APUSH                 | 1 |
| jimmyjoy              | 1 |

|                       |   |
|-----------------------|---|
| asmr                  | 1 |
| wineskin              | 1 |
| TheEricAndreShow      | 1 |
| ccna                  | 1 |
| CrazyHand             | 1 |
| Howsmytire            | 1 |
| wifepictrading        | 1 |
| USF                   | 1 |
| taekwondo             | 1 |
| phish                 | 1 |
| coincollecting        | 1 |
| AppleBandMarket       | 1 |
| AngelaWhite           | 1 |
| Witcher3              | 1 |
| punk                  | 1 |
| raspberry_pi          | 1 |
| wincest               | 1 |
| RandomActsOfBlowJob   | 1 |
| wsb                   | 1 |
| autorepair            | 1 |
| WrestleWithThePackage | 1 |
| StonerPhilosophy      | 1 |
| Louisvuitton          | 1 |
| FragDecants           | 1 |
| deletefacebook        | 1 |
| StopGaming            | 1 |
| asianpeoplegifs       | 1 |
| csgolounge            | 1 |
| MCFC                  | 1 |
| CannabisEntrepreneurs | 1 |
| TheTwitterFeed        | 1 |
| JOIP                  | 1 |
| paydaytheheistmods    | 1 |
| bouldering            | 1 |
| PublicFlashing        | 1 |
| jerma985              | 1 |
| NiceMods              | 1 |
| Shadman               | 1 |
| notebooks             | 1 |
| quiver                | 1 |
| NintendoSwitchDesigns | 1 |
| SubstratumNetwork     | 1 |
| SNSD                  | 1 |
| Design                | 1 |
| forhonorknights       | 1 |

|                     |   |
|---------------------|---|
| 49ers               | 1 |
| lotr                | 1 |
| SimCity             | 1 |
| Nirvana             | 1 |
| Titties             | 1 |
| FinancialPlanning   | 1 |
| Heavymind           | 1 |
| florida             | 1 |
| aSongOfMemesAndRage | 1 |
| supremereps         | 1 |
| statenisland        | 1 |
| KeepOurNetFree      | 1 |
| fit                 | 1 |
| lululemon           | 1 |
| bikewrench          | 1 |
| fragsplits          | 1 |
| DrugArt             | 1 |
| smashgifs           | 1 |
| BTD5                | 1 |
| StormAge            | 1 |
| ottawa              | 1 |
| skytrader           | 1 |
| PanoramaFest        | 1 |
| cartoons            | 1 |
| wedding             | 1 |
| hillaryclinton      | 1 |
| rickandmortytheory  | 1 |
| america             | 1 |
| conceptart          | 1 |
| pool                | 1 |
| chromeos            | 1 |
| virtualdj           | 1 |
| despacito           | 1 |
| DumpsterSluts       | 1 |
| cybermonday         | 1 |
| Pokemontutoring     | 1 |
| Twixtor             | 1 |
| dragonquest         | 1 |
| sugarfreemua        | 1 |
| BitMEX              | 1 |
| UnexpectedThugLife  | 1 |
| ConanExiles         | 1 |
| Madlib              | 1 |
| Miami               | 1 |
| waltonchain         | 1 |

|                     |   |
|---------------------|---|
| bois                | 1 |
| religion            | 1 |
| musicmarketing      | 1 |
| bugs                | 1 |
| AerialPorn          | 1 |
| hopelesssofrantic   | 1 |
| tax                 | 1 |
| whatsthisworth      | 1 |
| UCSantaBarbara      | 1 |
| boogiemusic         | 1 |
| pixel_phones        | 1 |
| FortniteLFP         | 1 |
| WizardofLegend      | 1 |
| Soda                | 1 |
| jimmyjohns          | 1 |
| wowthanksimcured    | 1 |
| lgv20               | 1 |
| startrek            | 1 |
| VanishingTech       | 1 |
| ImagesOfNewYork     | 1 |
| FifaMobileBuySell   | 1 |
| BadMensAnatomy      | 1 |
| lolgrindr           | 1 |
| offlineTV           | 1 |
| DnDGreentext        | 1 |
| FestivalTrees       | 1 |
| Amnesia             | 1 |
| Chiraqology         | 1 |
| Crouton             | 1 |
| whitepeoplegifs     | 1 |
| NCSU                | 1 |
| ultimate            | 1 |
| hentaivids          | 1 |
| FootFetish          | 1 |
| armpitfetish        | 1 |
| Balls               | 1 |
| u_b-a-b-a-y-e-e     | 1 |
| u_DapDonut          | 1 |
| steroids            | 1 |
| costochondritis     | 1 |
| pokemonduel         | 1 |
| IreliaMains         | 1 |
| CarAudioFabrication | 1 |
| ShittyArt           | 1 |
| typewriters         | 1 |

|                     |   |
|---------------------|---|
| boobbounce          | 1 |
| festivals           | 1 |
| ShitPoliticsSays    | 1 |
| KerbalSpaceProgram  | 1 |
| highseddit          | 1 |
| MCPEfamily          | 1 |
| normalnudes         | 1 |
| Bodybuildingforum   | 1 |
| Trumpgret           | 1 |
| steam_giveaway      | 1 |
| twitchplayspokemon  | 1 |
| plexshares          | 1 |
| submechanophobia    | 1 |
| thebutton           | 1 |
| TheForest           | 1 |
| altcoin             | 1 |
| Unboxtherapy        | 1 |
| imsa                | 1 |
| maybemaybemaybe     | 1 |
| hawwkey             | 1 |
| Mydaily3            | 1 |
| SoftwareEngineering | 1 |
| valve               | 1 |
| SugarPine7          | 1 |
| pokemongola         | 1 |
| BudgetAudiophile    | 1 |
| ToyotaSupra         | 1 |
| ULgeartrade         | 1 |
| coopplay            | 1 |
| TweakBounty         | 1 |
| trumpet             | 1 |
| KidCudi             | 1 |
| BoundlessVapes      | 1 |
| cade                | 1 |
| send_nudes          | 1 |
| wisconsin           | 1 |
| u_lamdudumAusculto  | 1 |
| LowTierTradingRL    | 1 |
| ACPocketCamp        | 1 |
| freebietalk         | 1 |
| AskHealth           | 1 |
| ICanDrawThat        | 1 |
| pharmacy            | 1 |
| DIY_eJuiceExchange  | 1 |
| UpvotedBecauseButt  | 1 |



|                       |   |
|-----------------------|---|
| eleaf                 | 1 |
| ausents               | 1 |
| reddit_silver         | 1 |
| shortstories          | 1 |
| Handwriting           | 1 |
| cozypubs              | 1 |
| freemoney             | 1 |
| classiccars           | 1 |
| ItWasMyFriend         | 1 |
| AzureLane             | 1 |
| Xcom                  | 1 |
| streetwear_memes      | 1 |
| DokkanBattleCommunity | 1 |
| googlecloud           | 1 |
| u_Shadow_Wolf0246     | 1 |
| amihot                | 1 |
| nintendolabo          | 1 |
| Romania               | 1 |
| angry                 | 1 |
| titanfolk             | 1 |
| SluttyConfessions     | 1 |
| futurefunkairlines    | 1 |
| bloomington           | 1 |
| Ravenfield            | 1 |
| u_jianyang1337        | 1 |
| Southerncharm         | 1 |
| Mariners              | 1 |
| RCycling              | 1 |
| u_ogDings02           | 1 |
| ProtonMail            | 1 |
| lotrmemes             | 1 |
| oddlyweird            | 1 |
| physicaltherapy       | 1 |
| MarkMyWords           | 1 |
| infiniti              | 1 |
| kindafunny            | 1 |
| HeavySeas             | 1 |
| JiggleFuck            | 1 |
| backpacking           | 1 |
| HealthInsurance       | 1 |
| pksp                  | 1 |
| FlashGames            | 1 |
| H1Z1OnPS4             | 1 |
| ParisDylan            | 1 |
| AskVet                | 1 |

|                       |   |
|-----------------------|---|
| anime_irl             | 1 |
| DrugNerds             | 1 |
| StraightGirlsPlaying  | 1 |
| ohwonder              | 1 |
| NSFW_HORNY_GIRLS      | 1 |
| binance               | 1 |
| StreetwearLegitChecks | 1 |
| feedthebeastservers   | 1 |
| tevotarantula         | 1 |
| Genuine_Memes         | 1 |
| BossFights            | 1 |
| redditsync            | 1 |
| bees                  | 1 |
| Sneaking              | 1 |
| appdev                | 1 |
| cokebears             | 1 |
| fordfusion            | 1 |
| SoylentMarket         | 1 |
| howitsmade            | 1 |
| Mixcraft_Studio       | 1 |
| rockhounds            | 1 |
| pixallio              | 1 |
| Faces                 | 1 |
| ImaginaryHybrids      | 1 |
| EndlessSpace          | 1 |
| cannabiscultivation   | 1 |
| ontario               | 1 |
| Archery               | 1 |
| nugporn               | 1 |
| ATT                   | 1 |
| Allotment             | 1 |
| ifiwonthelottery      | 1 |
| SisyphusIndustries    | 1 |
| ProperAnimalNames     | 1 |
| adidas                | 1 |
| wrestling             | 1 |
| csgogambling          | 1 |
| Invisalign            | 1 |
| lol                   | 1 |
| unexpectedclue        | 1 |
| ios7                  | 1 |
| CodinGeek             | 1 |
| u_lamNickJones        | 1 |
| ICoveredASong         | 1 |
| justiceleague         | 1 |

|                       |   |
|-----------------------|---|
| Archeology            | 1 |
| Electoral_College     | 1 |
| COents                | 1 |
| indianews             | 1 |
| footbaww              | 1 |
| Wizard101             | 1 |
| Jcole                 | 1 |
| santacruzents         | 1 |
| 4x4                   | 1 |
| scooter               | 1 |
| sportsjerseys         | 1 |
| simbot                | 1 |
| atheistparents        | 1 |
| EllieMain             | 1 |
| KnightsOfPineapple    | 1 |
| IsTodayFridayThe13th  | 1 |
| WatchRedditDie        | 1 |
| DiagnoseMe            | 1 |
| ketogains             | 1 |
| knifeclub             | 1 |
| NetSpend              | 1 |
| shittydarksouls       | 1 |
| OnBenchNow            | 1 |
| scifi                 | 1 |
| triangle              | 1 |
| Vanic                 | 1 |
| dashcamgifs           | 1 |
| victoriajustice       | 1 |
| Destiny_2             | 1 |
| AmazonMerch           | 1 |
| UnexpectedPrequelMeme | 1 |
| gloving               | 1 |
| TeamSESH              | 1 |
| u_MickeyReddit2016    | 1 |
| ShittyPickupLines     | 1 |
| Toonami               | 1 |
| GroupOfNudeGirls      | 1 |
| RutgersNewark         | 1 |
| dnp                   | 1 |
| Traderfeedback        | 1 |
| AbsoluteUnits         | 1 |
| NBAForums             | 1 |
| TarkovTrading         | 1 |
| PRXJEK                | 1 |
| emulation             | 1 |

|                      |   |
|----------------------|---|
| beards               | 1 |
| heat                 | 1 |
| AsianAndy            | 1 |
| sffpc                | 1 |
| firstimpression      | 1 |
| shrug                | 1 |
| Nioh                 | 1 |
| CastleClash          | 1 |
| redditrequest        | 1 |
| e30classifieds       | 1 |
| bee_irl              | 1 |
| Momokun_MariahMallad | 1 |
| HomeDepot            | 1 |
| amipregnant          | 1 |
| CanadianMOMs         | 1 |
| fairytail            | 1 |
| thebachelor          | 1 |
| Lexus                | 1 |
| morebreedingdittos   | 1 |
| villanova            | 1 |
| LV426                | 1 |
| homework_help        | 1 |
| WisconsinBadgers     | 1 |
| TalkWithSomeone      | 1 |
| badbadnotgood        | 1 |
| FierceFlow           | 1 |
| foshelter            | 1 |
| reverselegaladvice   | 1 |
| Bioshock             | 1 |
| CompanyBattles       | 1 |
| rwallpaperchanger    | 1 |
| RandomActsOfPolish   | 1 |
| CartoonNetwork       | 1 |
| CaseClickerChannels  | 1 |
| CaliPedes            | 1 |
| NoContract           | 1 |
| WeightTraining       | 1 |
| trackers             | 1 |
| questions            | 1 |
| urbantees            | 1 |
| soulseeker           | 1 |
| VPS                  | 1 |
| EnterTheGungeon      | 1 |
| SMU                  | 1 |
| HansaDarknetMarket   | 1 |

|                      |   |
|----------------------|---|
| u_ffcashmania        | 1 |
| geography            | 1 |
| led_zeppelin         | 1 |
| LSDGamers            | 1 |
| DoMyHomework         | 1 |
| gunship              | 1 |
| cbdjuul              | 1 |
| shiba                | 1 |
| DCents               | 1 |
| mountandblade        | 1 |
| comedyhomicide       | 1 |
| BokuNoMetaAcademia   | 1 |
| PiratedGTA           | 1 |
| CZFirearms           | 1 |
| berlin               | 1 |
| Catholicism          | 1 |
| grammar              | 1 |
| PuffinbirdAlogRS     | 1 |
| GEazy                | 1 |
| cute                 | 1 |
| curvy                | 1 |
| DeathGripsCirclejerk | 1 |
| androidroot          | 1 |
| mylittlepony         | 1 |
| seemslegit           | 1 |
| boardgames           | 1 |
| WTFgaragesale        | 1 |
| CelebrityFeet        | 1 |
| NSFW_GIF             | 1 |
| backgammon           | 1 |
| Mercerinfo           | 1 |
| scfeedback           | 1 |
| FalloutMods          | 1 |
| BringMeTheHorizon    | 1 |
| handguns             | 1 |
| coupons              | 1 |
| Negareddit           | 1 |
| Truckers             | 1 |
| gayyoungold          | 1 |
| Clerks               | 1 |
| BitcoinPrivate       | 1 |
| whatsthisfish        | 1 |
| shroomers            | 1 |
| IdiotsFightingThings | 1 |
| PokeGo2              | 1 |

|                    |   |
|--------------------|---|
| KiraKosarin        | 1 |
| electriczoo        | 1 |
| KarmaStore         | 1 |
| ukulele            | 1 |
| battleshops        | 1 |
| dtvn_accountmarket | 1 |
| hughmungus         | 1 |
| OverwatchTMZ       | 1 |
| behindthegifs      | 1 |
| Homebrews          | 1 |
| leakthreads        | 1 |
| RocketLeaguePS4    | 1 |
| VertcoinMining     | 1 |
| Drugtest           | 1 |
| AskAnAmerican      | 1 |
| Project_Badass     | 1 |
| Pathfinder_RPG     | 1 |
| screenshots        | 1 |
| twitchstreams      | 1 |
| Miscreated         | 1 |
| cookiedecorating   | 1 |
| vandwellers        | 1 |
| Twokinds           | 1 |
| DrunkText          | 1 |
| ChrisChanSonichu   | 1 |
| algotrading        | 1 |
| SFGSocial          | 1 |
| doodles            | 1 |
| Sannatorr          | 1 |
| Timberland         | 1 |
| Metallica          | 1 |
| Nexus6P            | 1 |
| coys               | 1 |
| nbastreams         | 1 |
| Borderlands_3      | 1 |
| Inventions         | 1 |
| minishibe          | 1 |
| Parkour            | 1 |
| 90sdesign          | 1 |
| Hmmmmm             | 1 |
| meme_hell          | 1 |
| BoardGameExchange  | 1 |
| april30th2015      | 1 |
| penguins           | 1 |
| Anticonsumption    | 1 |

|                       |   |
|-----------------------|---|
| u_Seemslikesam        | 1 |
| classicalmusic        | 1 |
| hisnameishb           | 1 |
| mercedes              | 1 |
| FiestaST              | 1 |
| PAWGtastic            | 1 |
| u_khuber123           | 1 |
| Emuwarflashbacks      | 1 |
| bigtiddygothgf        | 1 |
| altrap                | 1 |
| rcdrift               | 1 |
| RocketLeagueSexChange | 1 |
| u_tallglassofH2O      | 1 |
| scenes                | 1 |
| WorldOfWarships       | 1 |
| Pontiac               | 1 |
| bingingwithbabish     | 1 |
| cults                 | 1 |
| WoahTube              | 1 |
| luigi_irl             | 1 |
| TinyGladiators        | 1 |
| minimalism            | 1 |
| JhinMains             | 1 |
| panoramicsgonewrong   | 1 |
| hiphopvinyl           | 1 |
| crusadersquest        | 1 |
| LipsThatGrip          | 1 |
| womensstreetwear      | 1 |
| StonerThoughts        | 1 |
| CRH                   | 1 |
| SarahRoseMcDaniel     | 1 |
| csgocritic            | 1 |
| fragrance             | 1 |
| DDLCSmods             | 1 |
| chillout              | 1 |
| firstworldproblems    | 1 |
| singapore             | 1 |
| CrackheadCraigslist   | 1 |
| UBreddit              | 1 |
| ThisIsOurMusic        | 1 |
| PoliceVehicles        | 1 |
| learningcss123        | 1 |
| KnifeRaffle           | 1 |
| u_RavageBladez        | 1 |
| FalcoMains            | 1 |

|                      |   |
|----------------------|---|
| DeformationHentai    | 1 |
| marthasvineyard      | 1 |
| ptcgo                | 1 |
| firefighters         | 1 |
| Oxbitcoin            | 1 |
| Pay_Respects         | 1 |
| Favor                | 1 |
| CompetitiveMinecraft | 1 |
| tripreports          | 1 |
| youseeingthisshit    | 1 |
| prisonhooch          | 1 |
| Volkswagen           | 1 |
| medievaldoctor       | 1 |
| breathinginformation | 1 |
| swedishsnus          | 1 |
| SteamMarket          | 1 |
| iwatchedanoldmovie   | 1 |
| DestinyDadJokes      | 1 |
| fraud                | 1 |
| Pyongyang            | 1 |
| manchester           | 1 |
| PurpleCoco           | 1 |
| Career_Advice        | 1 |
| Artifact             | 1 |
| camarillo            | 1 |
| Howwastoday          | 1 |
| 3dspiracy            | 1 |
| Smartphones          | 1 |
| ETNmining            | 1 |
| Adoption             | 1 |
| u_MexkeyJuan         | 1 |
| KanyeLeaks           | 1 |
| SchwiftyIDs          | 1 |
| awardtravel          | 1 |
| BoarVesselMemes      | 1 |
| GoneMild             | 1 |
| Anarchism            | 1 |
| WeedWiki             | 1 |
| FuckYou              | 1 |
| wesanderson          | 1 |
| Preparedness         | 1 |
| SCU                  | 1 |
| picrequests          | 1 |
| AtheisticTeens       | 1 |
| girls farting        | 1 |



|                     |   |
|---------------------|---|
| czscorpion          | 1 |
| H1Z1LFG             | 1 |
| 21savage            | 1 |
| Nexus               | 1 |
| FreezingColdTakes   | 1 |
| HadToHurt           | 1 |
| SteamTradingCards   | 1 |
| football            | 1 |
| heap                | 1 |
| Lightning           | 1 |
| AtlantaHawks        | 1 |
| fortniteSSD         | 1 |
| CryptoWorth         | 1 |
| Perfume             | 1 |
| mcpublic            | 1 |
| jtag360             | 1 |
| getkarma            | 1 |
| u_rosssands4        | 1 |
| huffing             | 1 |
| noxappplayer        | 1 |
| tailosive           | 1 |
| redneckengineering  | 1 |
| Network             | 1 |
| RealAhegao          | 1 |
| whitepeoplefacebook | 1 |
| tattoo              | 1 |
| Hunting             | 1 |
| gamingsetup         | 1 |
| scrapinghub         | 1 |
| pools               | 1 |
| u_pawgnation462     | 1 |
| sousvide            | 1 |
| flavortown          | 1 |
| goodkarma           | 1 |
| cumsluts            | 1 |
| ClassicNation       | 1 |
| nedforpresident     | 1 |
| Voting              | 1 |
| aphextwin           | 1 |
| mazda               | 1 |
| catsareliquid       | 1 |
| notdisneyvacation   | 1 |
| ExpanseOfficial     | 1 |
| FeetToesAndSocks    | 1 |
| snapsext            | 1 |

|                     |   |
|---------------------|---|
| Hawaii              | 1 |
| AskManagement       | 1 |
| Chattanooga         | 1 |
| fleshlight          | 1 |
| VirtualCosplay      | 1 |
| nsfw_video          | 1 |
| crappycontouring    | 1 |
| bingbongtheorem     | 1 |
| PoliticalScience    | 1 |
| lifeisstrange       | 1 |
| Viceland            | 1 |
| csharp              | 1 |
| Amtrak              | 1 |
| NormMacdonald       | 1 |
| Internet_Strangers  | 1 |
| FuckTanya           | 1 |
| 9gag                | 1 |
| czech               | 1 |
| CountOnceADay       | 1 |
| gangplankmains      | 1 |
| fantasybaseball     | 1 |
| Batch               | 1 |
| Stock_Picks         | 1 |
| BubbleHash          | 1 |
| CherokeeXJ          | 1 |
| gamingcomputer      | 1 |
| 3atatime            | 1 |
| Scary               | 1 |
| pihole              | 1 |
| flightattendants    | 1 |
| RedditLaqueristas   | 1 |
| mcgill              | 1 |
| controllablewebcams | 1 |
| Greek_Mythology     | 1 |
| Overwatch_Porn      | 1 |
| oklahoma            | 1 |
| Dudeism             | 1 |
| XboxModding         | 1 |
| Awww                | 1 |
| battlefield3        | 1 |
| HealthAnxiety       | 1 |
| redditlogos         | 1 |
| PartneredYoutube    | 1 |
| Stellar             | 1 |
| budgetdecks         | 1 |

|                       |   |
|-----------------------|---|
| hometheater           | 1 |
| Dollywinks            | 1 |
| maryland              | 1 |
| pokemonteam           | 1 |
| WhatsThisShoe         | 1 |
| Agorism               | 1 |
| PC_Builders           | 1 |
| JojosBizarreMemePage  | 1 |
| LetItDie              | 1 |
| labrador              | 1 |
| ShitPostCrusaders     | 1 |
| StartledCats          | 1 |
| UHRswork              | 1 |
| NewGirl               | 1 |
| amrc                  | 1 |
| ApocalypseRising      | 1 |
| witcher               | 1 |
| tacticalgear          | 1 |
| berkeley              | 1 |
| trypophobia           | 1 |
| CSGOscamList          | 1 |
| BitcoinMarkets        | 1 |
| darknet               | 1 |
| Bloggng               | 1 |
| troubledteens         | 1 |
| BleachBraveSouls      | 1 |
| PSHFlatEarth          | 1 |
| latin                 | 1 |
| shittyideas           | 1 |
| AppNana               | 1 |
| Allsvenskan           | 1 |
| CabaloftheBuildsmiths | 1 |
| Battlegrounds         | 1 |
| IAmAFiction           | 1 |
| Pets                  | 1 |
| sales                 | 1 |
| Crewniverse           | 1 |
| Transmogrification    | 1 |
| writingdaily          | 1 |
| youtubecomments       | 1 |
| PinkFloydCircleJerk   | 1 |
| Culvers               | 1 |
| cheesecake            | 1 |
| icehockey             | 1 |
| Colts                 | 1 |

|                      |   |
|----------------------|---|
| retrogameswap        | 1 |
| Ghosts               | 1 |
| deadcells            | 1 |
| VolvoRWD             | 1 |
| warframeclanrecruit  | 1 |
| fullscorpien         | 1 |
| kurdistan            | 1 |
| sevenknightsfriends  | 1 |
| TrollXChromosomes    | 1 |
| upvote_for_upvote    | 1 |
| BossfightUniverse    | 1 |
| Greyhounds           | 1 |
| hcfactions           | 1 |
| Economics            | 1 |
| nsfw                 | 1 |
| MeepoBoards          | 1 |
| NotTimAndEric        | 1 |
| relationships_advice | 1 |
| editing              | 1 |
| aimdownsights        | 1 |
| Unextented           | 1 |
| linuxmemes           | 1 |
| DadReflexes          | 1 |
| ftm                  | 1 |
| wedidit              | 1 |
| IAmARequests         | 1 |
| Anxietyhelp          | 1 |
| KingOfTheHill        | 1 |
| Naturewasmetal       | 1 |
| LakeLaogai           | 1 |
| MapleStory2          | 1 |
| badselfeater         | 1 |
| shittylimos          | 1 |
| pokies               | 1 |
| Reddit_bronze        | 1 |
| CHART_BOT            | 1 |
| driving              | 1 |
| DexterKicksbar       | 1 |
| SonyXperia           | 1 |
| wallpaper            | 1 |
| LegendsOfTomorrow    | 1 |
| RateMeUnder18        | 1 |
| pickuylines          | 1 |
| Patches              | 1 |
| bioniclelego         | 1 |

|                      |   |
|----------------------|---|
| cycling              | 1 |
| anonymous            | 1 |
| graphicscard         | 1 |
| NewToReddit          | 1 |
| CSGOKnives           | 1 |
| meth                 | 1 |
| ThatPeelingFeeling   | 1 |
| VPNTorrents          | 1 |
| stopdrinking         | 1 |
| musical_instruments  | 1 |
| TreesSuckingOnThings | 1 |
| bigboye              | 1 |
| collegesluts         | 1 |
| deals                | 1 |
| NEU                  | 1 |
| Konosuba             | 1 |
| Turkey               | 1 |
| MapleStoryM          | 1 |
| Austin               | 1 |
| reddit.com           | 1 |
| ToCatchAPredator     | 1 |
| Wiffleball           | 1 |
| excel                | 1 |
| AMCsAList            | 1 |
| Goldfish             | 1 |
| beats                | 1 |
| AlwaysSunnyGifs      | 1 |
| SubForSub            | 1 |
| mturk                | 1 |
| Dankquan             | 1 |
| proxies              | 1 |
| riddim               | 1 |
| spongebob            | 1 |
| NFL_Draft            | 1 |
| DesirePath           | 1 |
| cannabis             | 1 |
| Edits                | 1 |
| LawSchool            | 1 |
| anal_gifs            | 1 |
| GuessTheMovie        | 1 |
| Hempire              | 1 |
| chemhelp             | 1 |
| BeautyGuruChatter    | 1 |
| adwords              | 1 |
| brokenbones          | 1 |

|                       |   |
|-----------------------|---|
| karma4karma           | 1 |
| Mauser                | 1 |
| ZClassic              | 1 |
| AskMechanics          | 1 |
| Superbuy              | 1 |
| AP_Physics            | 1 |
| AsianHotties          | 1 |
| nutella               | 1 |
| DaveRamsey            | 1 |
| Trucks                | 1 |
| u_Hawk7117            | 1 |
| OverwatchCompetitive  | 1 |
| introvert             | 1 |
| UBC                   | 1 |
| JacksFilms            | 1 |
| predaddit             | 1 |
| HSPulls               | 1 |
| TopGear               | 1 |
| elderscrollsonline    | 1 |
| dgu                   | 1 |
| DarkSouls2            | 1 |
| gamingsuggestions     | 1 |
| demifiendnocturne     | 1 |
| ubereatspromocodes    | 1 |
| ModernTwin            | 1 |
| GetStudying           | 1 |
| electricdaisycarnival | 1 |
| Competitive_Overwatch | 1 |
| egg_irl               | 1 |
| cynicalbritofficial   | 1 |
| GetOffMyChest         | 1 |
| Xbox_One_X            | 1 |
| unturned              | 1 |
| BDSMAdvice            | 1 |
| ParanormalEncounters  | 1 |
| Prematurecelebration  | 1 |
| deadpool              | 1 |
| physicsgifs           | 1 |
| banme                 | 1 |
| MonsterHunter         | 1 |
| malta                 | 1 |
| tacobell              | 1 |
| Infinitewarfare       | 1 |
| iOSProgramming        | 1 |
| portabledabs          | 1 |

|                     |   |
|---------------------|---|
| CompetitiveHS       | 1 |
| Wawa                | 1 |
| OculusStore         | 1 |
| Persona4Chie        | 1 |
| spicy               | 1 |
| upvote              | 1 |
| CalamariRaceTeam    | 1 |
| u_irishAaron5963    | 1 |
| EANHLfranchise      | 1 |
| coincidence         | 1 |
| forhire             | 1 |
| Crush               | 1 |
| scufgaming          | 1 |
| gamingsetups        | 1 |
| ImagesOfIllinois    | 1 |
| whoooosh            | 1 |
| SeattleWA           | 1 |
| dataisugly          | 1 |
| maker               | 1 |
| 911FOX              | 1 |
| ShitMomGroupsSay    | 1 |
| Gundam              | 1 |
| MURICA              | 1 |
| cottontails         | 1 |
| yardsale            | 1 |
| beholdthemasterrace | 1 |
| Sense8              | 1 |
| SoundCloudHipHop    | 1 |
| JeepWrangler        | 1 |
| transpassing        | 1 |
| FirePorn            | 1 |
| JaneTheVirginCW     | 1 |
| Multicopter         | 1 |
| lgwatchsport        | 1 |
| u_Dogacado          | 1 |
| YoungThug           | 1 |
| CompetitiveForHonor | 1 |
| u_GoD_pewpew        | 1 |
| GetMoreViewsYT      | 1 |
| intothetunnel       | 1 |
| CodingHelp          | 1 |
| BigBrother          | 1 |
| scouting            | 1 |
| The_Purple_Order    | 1 |
| FortNiteLFG         | 1 |

|                      |   |
|----------------------|---|
| SourceFed            | 1 |
| WOWGO                | 1 |
| famousdex            | 1 |
| trippieredd          | 1 |
| longboardingGEAR     | 1 |
| FinalMouse           | 1 |
| kitty                | 1 |
| paxful               | 1 |
| drawme               | 1 |
| nxyz                 | 1 |
| uvtrade              | 1 |
| pulpfiction          | 1 |
| Golf_R               | 1 |
| Reddit_Inquisition   | 1 |
| KansasCityChiefs     | 1 |
| MtF                  | 1 |
| erau                 | 1 |
| unexpectedpedo       | 1 |
| communism101         | 1 |
| immigration          | 1 |
| nukedmemes           | 1 |
| ExpectationVsReality | 1 |
| MASFandom            | 1 |
| characterdrawing     | 1 |
| DHgate               | 1 |
| AFL                  | 1 |
| AMDHHelp             | 1 |
| InteriorDesign       | 1 |
| burlington           | 1 |
| djiphantom           | 1 |
| FACEITcom            | 1 |
| xqcow                | 1 |
| worldbuilding        | 1 |
| Phobia               | 1 |
| greenday             | 1 |
| YouShouldKnow        | 1 |
| msu                  | 1 |
| quittingkratom       | 1 |
| smallbusiness        | 1 |
| insults              | 1 |
| u_GodseySupply       | 1 |
| naturalbodybuilding  | 1 |
| stratisplatform      | 1 |
| MyrtleBeach          | 1 |
| RequestABot          | 1 |



|                       |   |
|-----------------------|---|
| FuckJeffSessions      | 1 |
| Totallyaccuratebattle | 1 |
| EnglishLearning       | 1 |
| PeakyBlinders         | 1 |
| wowservers            | 1 |
| Dirtykikpals2         | 1 |
| stickpokes            | 1 |
| AmateurPorn           | 1 |
| AlbumArtPorn          | 1 |
| boburnham             | 1 |
| mailroom              | 1 |
| Random_Acts_Of_Amazon | 1 |
| u_the_jacob_perez     | 1 |
| redheads              | 1 |
| ps3hacks              | 1 |
| MorbidReality         | 1 |
| teen_fashion_advice   | 1 |
| spiral_knights        | 1 |
| Clash_Royal           | 1 |
| ctbeer                | 1 |
| unrealtournament      | 1 |
| rheumatoid            | 1 |
| eFreebies             | 1 |
| amazonecho            | 1 |
| darksouls             | 1 |
| future_fight          | 1 |
| UnnecessaryQuotes     | 1 |
| Flightkickz           | 1 |
| promos                | 1 |
| Bellingham            | 1 |
| TankiOnline           | 1 |
| horizon               | 1 |
| metals                | 1 |
| vegas                 | 1 |
| OddlyArousing         | 1 |
| DMAcademy             | 1 |
| euthanasia            | 1 |
| doctors               | 1 |
| bdsmSFW               | 1 |
| VACsucks              | 1 |
| OneNote               | 1 |
| ChivalryGame          | 1 |
| hookup                | 1 |
| HPHogwartsMystery     | 1 |
| f150                  | 1 |

|                      |   |
|----------------------|---|
| LitecoinCashMarkets  | 1 |
| gtafriends           | 1 |
| ProshotMusicals      | 1 |
| IsaiahRashad         | 1 |
| RateMyGf             | 1 |
| u_TrippyHippyCrew    | 1 |
| Tianeptine           | 1 |
| JeepLiberty          | 1 |
| liluglymane          | 1 |
| wikipedia            | 1 |
| OhioStateFootball    | 1 |
| Mcat                 | 1 |
| weeabootales         | 1 |
| tech                 | 1 |
| askphilosophy        | 1 |
| NSFW_GIF             | 1 |
| 4.82E+09             | 1 |
| AtlantaTV            | 1 |
| TWDRoadToSurvival    | 1 |
| WGU                  | 1 |
| Soulnexus            | 1 |
| aznidentity          | 1 |
| hmmmgifs             | 1 |
| shittytumblrgifs     | 1 |
| AnimalsBeingDerps    | 1 |
| Addons4Kodi          | 1 |
| RowanUniversity      | 1 |
| swoleacceptance      | 1 |
| Nepal                | 1 |
| LunaDragon           | 1 |
| Dominos              | 1 |
| lesbians             | 1 |
| cocktails            | 1 |
| Proofreading         | 1 |
| lepin                | 1 |
| Snek                 | 1 |
| IDmydog              | 1 |
| asianpornstars       | 1 |
| gonewildaudio        | 1 |
| iOSHoudini           | 1 |
| skateboardcirclejerk | 1 |
| allentown            | 1 |
| IsTodayOppositeDay   | 1 |
| legotrade            | 1 |
| casualnintendo       | 1 |

|                    |   |
|--------------------|---|
| GSkill             | 1 |
| PokemonROMhacks    | 1 |
| E30                | 1 |
| HMWH               | 1 |
| SexyFrex           | 1 |
| TinyTits           | 1 |
| Rowing             | 1 |
| democrats          | 1 |
| nspire             | 1 |
| geekboners         | 1 |
| lesbianr4r         | 1 |
| TVDetails          | 1 |
| Pitt               | 1 |
| stickers           | 1 |
| MakingIt_Show      | 1 |
| waluigidid911      | 1 |
| fixedgear          | 1 |
| ibs                | 1 |
| Birkenstocks       | 1 |
| ScarySigns         | 1 |
| titlegore          | 1 |
| UMF                | 1 |
| AskMarketing       | 1 |
| education          | 1 |
| GearTrade          | 1 |
| Miniworlds         | 1 |
| CopyPastas         | 1 |
| ShortFilm          | 1 |
| DannyBrown         | 1 |
| whenitgoesin       | 1 |
| birthday           | 1 |
| Georgia            | 1 |
| CollegeatBrockport | 1 |
| macgaming          | 1 |
| PicsofCouples      | 1 |
| RemixOS            | 1 |
| serialkillers      | 1 |
| actuary            | 1 |
| functionaldrugs    | 1 |
| Ask_Lawyers        | 1 |
| GHOSTEMANE         | 1 |
| Falconry           | 1 |
| genderfluid        | 1 |
| DebateCommunism    | 1 |
| texts              | 1 |

|                     |   |
|---------------------|---|
| Carving             | 1 |
| counterstrikego     | 1 |
| AskNetsec           | 1 |
| OCLions             | 1 |
| ReadyOrNotGame      | 1 |
| interstellar        | 1 |
| Texans              | 1 |
| PokemonInsurgence   | 1 |
| carscirclejerk      | 1 |
| BitcoinMarkets_test | 1 |
| flyfishing          | 1 |
| Toreba              | 1 |
| JapanTravel         | 1 |
| nameaserver         | 1 |
| DirtyJokes          | 1 |
| GoNets              | 1 |
| SOPA                | 1 |
| MegaMoney           | 1 |
| PiratedGames        | 1 |
| JessicaNigri        | 1 |
| osureport           | 1 |
| stunfisk            | 1 |
| FoundPaper          | 1 |
| bladeandsoul        | 1 |
| DeathStranding      | 1 |
| lolcats             | 1 |
| gaybros             | 1 |
| OriannaMains        | 1 |
| CryptoTrade         | 1 |
| Finobe              | 1 |
| cinematography      | 1 |
| love                | 1 |
| CubicleWarfare      | 1 |
| mechanical_keyboard | 1 |
| marchingband        | 1 |
| nhl                 | 1 |
| cm3d2               | 1 |
| sooners             | 1 |
| findaleague         | 1 |
| Drumming            | 1 |
| Gta5Modding         | 1 |
| Mushrooms           | 1 |
| yiff                | 1 |
| RealTesla           | 1 |
| UPS                 | 1 |

|                       |   |
|-----------------------|---|
| HollowKnight          | 1 |
| AmpliFi               | 1 |
| Puzzleboys            | 1 |
| springfieldMO         | 1 |
| newsreddits           | 1 |
| RedLetterMedia        | 1 |
| G37                   | 1 |
| ForbiddenCandy        | 1 |
| CouncilOfRicks        | 1 |
| AskDoctorSmeeee       | 1 |
| Ethnomethodology      | 1 |
| chemistrymemes        | 1 |
| JerseysClub           | 1 |
| TrueDetective         | 1 |
| u_BooyahAdvertising   | 1 |
| kahootraiding         | 1 |
| badwomensanatomy      | 1 |
| Getter                | 1 |
| AccidentalRenaissance | 1 |
| orioles               | 1 |
| averii                | 1 |
| e46                   | 1 |
| ROTC                  | 1 |
| CaptainTsubasaDT      | 1 |
| SS13                  | 1 |
| Nicegirls             | 1 |
| FifaMobile            | 1 |
| Chilledout            | 1 |
| bengals               | 1 |
| IncestComics          | 1 |
| alisio                | 1 |
| TwinCities            | 1 |
| philadelphia          | 1 |
| UCSC                  | 1 |
| AmISexy               | 1 |
| cscareerquestions     | 1 |
| Staples               | 1 |
| RetroPie              | 1 |
| UFOs                  | 1 |
| Coilporn              | 1 |
| AganistGayMarriage    | 1 |
| polls                 | 1 |
| elonmusk              | 1 |
| TruthOrTrump          | 1 |
| angst                 | 1 |

|                       |   |
|-----------------------|---|
| rocket_league_trading | 1 |
| Troy                  | 1 |
| BigTimeRush           | 1 |
| HighQualityReloads    | 1 |
| drunkandsad           | 1 |
| django                | 1 |
| SequelMememes         | 1 |
| animegifs             | 1 |
| ExplainItLikeImMorty  | 1 |
| gameshow              | 1 |
| xcodeh                | 1 |
| User_Simulator        | 1 |
| 60fpsporn             | 1 |
| drumcorps             | 1 |
| PlayJustSurvive       | 1 |
| bch                   | 1 |
| mehfaketexts          | 1 |
| PucaTrade             | 1 |
| nosneeze              | 1 |
| sixthworldproblems    | 1 |
| AskLE                 | 1 |
| COD_LFG               | 1 |
| demonssouls           | 1 |
| gifsthatendtoosoon    | 1 |
| Irony                 | 1 |
| DoesSheLikeMe         | 1 |
| McDonalds             | 1 |
| mariorule34           | 1 |
| ImagesOfOregon        | 1 |
| paszagonewild         | 1 |
| AskAMechanic          | 1 |
| ProductPorn           | 1 |
| RX7                   | 1 |
| mintmobile            | 1 |
| supportlol            | 1 |
| WendellGoldwater      | 1 |
| Oswego                | 1 |
| 911truth              | 1 |
| lota                  | 1 |
| ucla                  | 1 |
| yescompanionimbecil   | 1 |
| mashups               | 1 |
| kustom                | 1 |
| LeBlancMains          | 1 |
| avengedsevenfold      | 1 |

|                    |   |
|--------------------|---|
| playlists          | 1 |
| SFGiants           | 1 |
| PowerTV            | 1 |
| free_karma         | 1 |
| LDESurvival        | 1 |
| TheLastJedi        | 1 |
| keming             | 1 |
| mechanics          | 1 |
| HutCoinSelling     | 1 |
| csgomarketforum    | 1 |
| u_fireice2929      | 1 |
| soccerstreams      | 1 |
| factorio           | 1 |
| LilSkies           | 1 |
| Adirondacks        | 1 |
| fight              | 1 |
| hackersec          | 1 |
| survivorbeauty     | 1 |
| justTurnedEighteen | 1 |
| xenia              | 1 |
| Remington          | 1 |
| Polytopia          | 1 |
| BytecoinBCN        | 1 |
| USNEWS             | 1 |
| yorickmains        | 1 |
| NuFunk             | 1 |
| Battlefield2       | 1 |
| Battleborn         | 1 |
| YIMO               | 1 |
| bonehurtingair     | 1 |
| SanJose            | 1 |
| BostonU            | 1 |
| azirmains          | 1 |
| gopro              | 1 |
| mentalhealth       | 1 |
| IAmSelling         | 1 |
| ipad               | 1 |
| italy              | 1 |
| FightH1B           | 1 |
| swingersr4r        | 1 |
| shittyadvice       | 1 |
| CageTheElephant    | 1 |
| calmhands          | 1 |
| pastlives          | 1 |
| GameShare          | 1 |

|                       |   |
|-----------------------|---|
| singing               | 1 |
| PUBGXBOX              | 1 |
| UCONN                 | 1 |
| Ultraboost            | 1 |
| Steam_Link            | 1 |
| oddlyunsatisfying     | 1 |
| ImagesOfFlorida       | 1 |
| TheVGang              | 1 |
| Duolingoclubs         | 1 |
| shitty_ecr            | 1 |
| covers                | 1 |
| weightlifting         | 1 |
| MassiveCock           | 1 |
| newtothenavy          | 1 |
| WoT                   | 1 |
| dogeducation          | 1 |
| GetMotivatedBuddies   | 1 |
| guncontrol            | 1 |
| u_Steel_Punch2        | 1 |
| DeTrashed             | 1 |
| edencirclejerk        | 1 |
| yesthereis            | 1 |
| SkiRacing             | 1 |
| sunypoly              | 1 |
| j_chetta              | 1 |
| SissTest              | 1 |
| subredditideas        | 1 |
| LiveFromNewYork       | 1 |
| 2mad4earth            | 1 |
| pancreatitis          | 1 |
| UnionHouse            | 1 |
| Diablo                | 1 |
| IncestPorn            | 1 |
| chocolate             | 1 |
| HomePod               | 1 |
| vapormax              | 1 |
| tinnitus              | 1 |
| mrpickles             | 1 |
| neoliberal            | 1 |
| RocketLeaguePS4Trades | 1 |
| Braves                | 1 |
| blackdesertonline     | 1 |
| PhantomForSnapchat    | 1 |
| LisaAnn               | 1 |
| WatchExchangeFeedback | 1 |



|                       |   |
|-----------------------|---|
| WiiUHacks             | 1 |
| entrepreneur          | 1 |
| paragon               | 1 |
| 4hourbodyslowcarb     | 1 |
| DemiRoseMawby         | 1 |
| TonightShowFallon     | 1 |
| Peptides              | 1 |
| Snus                  | 1 |
| TeenMomOGandTeenMom2  | 1 |
| dirtypenpals          | 1 |
| Simulated             | 1 |
| StupidCarQuestions    | 1 |
| likeus                | 1 |
| bettereveryrepost     | 1 |
| playmavericks         | 1 |
| akalimains            | 1 |
| PrivateInternetAccess | 1 |
| UniClassof2023        | 1 |
| handslikehouses       | 1 |
| —                     | 1 |
| michaelcollins        | 1 |
| sodadungeon           | 1 |
| MUWs                  | 1 |
| SupremeResell         | 1 |
| Chiropractic          | 1 |
| AmericasArmyPS4       | 1 |
| oracle                | 1 |
| TrumpCriticizesTrump  | 1 |
| spotted               | 1 |
| LandCruisers          | 1 |
| rearpussy             | 1 |
| onewordeach           | 1 |
| iPhoneography         | 1 |
| PokePorn              | 1 |
| eldertrees            | 1 |
| riotmc                | 1 |
| AskEngineers          | 1 |
| AntiFlag              | 1 |
| miamioh               | 1 |
| PoliceChases          | 1 |
| uscg                  | 1 |
| Nudah                 | 1 |
| mtgfinance            | 1 |
| WoahTunes             | 1 |
| fortwayne             | 1 |

|                      |   |
|----------------------|---|
| Persona5             | 1 |
| painting             | 1 |
| trump                | 1 |
| funkopop             | 1 |
| PEDs                 | 1 |
| ButtSharpies         | 1 |
| Bostontreesforall    | 1 |
| seventhworldproblems | 1 |
| 13or30               | 1 |
| Survival             | 1 |
| utdallas             | 1 |
| roastmytrack         | 1 |
| LucioRollouts        | 1 |
| cyclocross           | 1 |
| prochoice            | 1 |
| paydaytheheist       | 1 |
| religiousfruitcake   | 1 |
| KneelInjuries        | 1 |
| simpleliving         | 1 |
| aberothtrading       | 1 |
| survivetheculling    | 1 |
| girlsoporn           | 1 |
| askdrugs             | 1 |
| BuffHydra            | 1 |
| ghettofunk           | 1 |
| SourceLiveAudioMixer | 1 |
| ReefTank             | 1 |
| TedDanzig            | 1 |
| Emo                  | 1 |
| PHP                  | 1 |
| IncrediblesMemes     | 1 |
| Bugatti              | 1 |
| traderjoes           | 1 |
| Tesla                | 1 |
| gamemaker            | 1 |
| iran                 | 1 |
| Titty_fuck_gif       | 1 |
| Metal                | 1 |
| DescentIntoTyranny   | 1 |
| psilocybin           | 1 |
| FaZe                 | 1 |
| startups             | 1 |
| AsianMasculinity     | 1 |
| UnexplainedPhotos    | 1 |
| ColumbiYEAH          | 1 |

|                    |   |
|--------------------|---|
| poppunkers         | 1 |
| TimAndEric         | 1 |
| comicbooks         | 1 |
| CHIBears           | 1 |
| thesopranos        | 1 |
| sidetrackedday     | 1 |
| iPhoneXS           | 1 |
| homelabsales       | 1 |
| ems                | 1 |
| Nr2003             | 1 |
| ProjectOblio       | 1 |
| coil_building      | 1 |
| curlygirl          | 1 |
| bartenders         | 1 |
| China              | 1 |
| bepis              | 1 |
| Helicopters        | 1 |
| Catloaf            | 1 |
| Verticalwallpapers | 1 |
| Lolice             | 1 |
| BDSMpersonals      | 1 |
| Antiques           | 1 |
| potcoin            | 1 |
| Huawei             | 1 |
| removalbot         | 1 |
| work               | 1 |
| geometrydash       | 1 |
| FCCincinnati       | 1 |
| Drumkits           | 1 |
| altcoinmining      | 1 |
| dankruto           | 1 |
| DragonballLegends  | 1 |
| CanadianForces     | 1 |
| arkhamknight       | 1 |
| HawaiiVisitors     | 1 |
| Pizza              | 1 |
| aesthetic          | 1 |
| ericandre          | 1 |
| fakeidsuperlist    | 1 |
| Harley             | 1 |
| watch_dogs         | 1 |
| PopCornTime        | 1 |
| FantasyPL          | 1 |
| CuttingWeight      | 1 |
| Charcuterie        | 1 |

|                     |   |
|---------------------|---|
| clevercomebacks     | 1 |
| Methadone           | 1 |
| Hair                | 1 |
| mildlyvagina        | 1 |
| cummingonfigurines  | 1 |
| POTUS               | 1 |
| Whistler            | 1 |
| C_S_T               | 1 |
| mercedes_benz       | 1 |
| KatelynNacon        | 1 |
| illusionporn        | 1 |
| Woodcarving         | 1 |
| Crunchyroll         | 1 |
| MysteryDungeon      | 1 |
| tesdcares           | 1 |
| freaksandgeeks      | 1 |
| brushybrushy        | 1 |
| Cumtown             | 1 |
| wiiu                | 1 |
| TomatoFTW           | 1 |
| mycology            | 1 |
| AmsterdamEnts       | 1 |
| theflash            | 1 |
| XRayPorn            | 1 |
| G35                 | 1 |
| Atkins              | 1 |
| AVexchange          | 1 |
| battlefield_live    | 1 |
| kendo               | 1 |
| japanesestreetwear  | 1 |
| GitBug              | 1 |
| plebflair           | 1 |
| ffxivcrafting       | 1 |
| Cisco               | 1 |
| standupshots        | 1 |
| pchelp              | 1 |
| GastricBypass       | 1 |
| NonZeroDay          | 1 |
| spaz                | 1 |
| ImaginaryWastelands | 1 |
| TheDarkTower        | 1 |
| noisygifs           | 1 |
| PhysicsStudents     | 1 |
| Nissan              | 1 |
| VapingInPhoenix     | 1 |

|                      |   |
|----------------------|---|
| economy              | 1 |
| perfectlycutscreams  | 1 |
| 1200isjerky          | 1 |
| roadtrip             | 1 |
| PaladinsStrike       | 1 |
| edubble              | 1 |
| Tarantino            | 1 |
| Harvard              | 1 |
| TAPBASEBALL          | 1 |
| justlegbeardthings   | 1 |
| NCAAFBseries         | 1 |
| RightwingLGBT        | 1 |
| poketcgonlinetrading | 1 |
| chillmusic           | 1 |
| howtoaddict          | 1 |
| Birmingham           | 1 |
| battleroyalegames    | 1 |
| CircLoLjerk          | 1 |
| hockeygoalies        | 1 |
| RobinHoodPennyStocks | 1 |
| AskSF                | 1 |
| wakieshitposts       | 1 |
| jetski               | 1 |
| lyftdrivers          | 1 |
| vapetricks           | 1 |
| begleri              | 1 |
| ArianaGrande         | 1 |
| DnD                  | 1 |
| Shoplyfter           | 1 |
| HairDye              | 1 |
| Haircare             | 1 |
| mantids              | 1 |
| homemaking           | 1 |
| kahootcrashing4kids  | 1 |
| Attila               | 1 |
| Ubuntu               | 1 |
| lincolndouglas       | 1 |
| diabetes             | 1 |
| birthcontrol         | 1 |
| lacroix              | 1 |
| singlespeed          | 1 |
| gaypornhunters       | 1 |
| moths                | 1 |
| touhou               | 1 |
| StudioOne            | 1 |

|                     |      |   |
|---------------------|------|---|
| Hulu                |      | 1 |
| ClickerHeroes       |      | 1 |
| humblebundles       |      | 1 |
| restofthefuckingowl |      | 1 |
| DemiLovato          |      | 1 |
| Craps               |      | 1 |
| isometric           |      | 1 |
| fivenightsatfreddys |      | 1 |
| frugalstreetwear    |      | 1 |
| Atlanta             |      | 1 |
| AirBnB              |      | 1 |
| R6ProLeague         |      | 1 |
| Syracuse            |      | 1 |
| ltc                 |      | 1 |
|                     | 1022 | 1 |
| KetoAndPoor         |      | 1 |
| dirtykikpals        |      | 1 |
| InstagramMarketing  |      | 1 |
| ShotGlassBets       |      | 1 |
| TopMindsOfReddit    |      | 1 |
| Keep_Track          |      | 1 |
| mdlds               |      | 1 |
| amateurradio        |      | 1 |
| richiesnose         |      | 1 |
| TheFacebookDelusion |      | 1 |
| HIMYM               |      | 1 |
| glasses             |      | 1 |
| snapchatgeofilters  |      | 1 |
| wtfstockphotos      |      | 1 |
| jacking             |      | 1 |
| YanetGarcia         |      | 1 |
| DaftPunk            |      | 1 |
| asoiaf              |      | 1 |
| UnexpectedMulaney   |      | 1 |
| dirtgame            |      | 1 |
| RealEstate          |      | 1 |
| trackandfield       |      | 1 |
| ASAPmob             |      | 1 |
| jrotc               |      | 1 |
| AmateurRoomPorn     |      | 1 |
| GFRIEND             |      | 1 |
| dating              |      | 1 |
| YouTubersGoneWild   |      | 1 |
| Afrodisiac          |      | 1 |
| DCTelevision        |      | 1 |

|                    |   |
|--------------------|---|
| SkyrimMemes        | 1 |
| lightshope         | 1 |
| JohnMayer          | 1 |
| pottoblame         | 1 |
| chachigonzales     | 1 |
| MrRobot            | 1 |
| theroom            | 1 |
| onejob             | 1 |
| Ethorse            | 1 |
| Warthunder         | 1 |
| JAILBREAKworld     | 1 |
| ClashDecks         | 1 |
| distension         | 1 |
| nocopyrightsounds  | 1 |
| mythology          | 1 |
| mazda3             | 1 |
| SoccerNoobs        | 1 |
| KhaZixMains        | 1 |
| KKKMOONMAN         | 1 |
| QMEE               | 1 |
| Thundercat         | 1 |
| FFXV               | 1 |
| u_shreksasscheek   | 1 |
| XCOM2              | 1 |
| options            | 1 |
| collegeresults     | 1 |
| CollegeEssayReview | 1 |
| KnifeDeals         | 1 |
| 2cx                | 1 |
| todayiwaslucky     | 1 |
| fantanoforever     | 1 |
| livesound          | 1 |
| SwitchFCSwap       | 1 |
| fashioneconomy     | 1 |
| freebeats          | 1 |
| homeautomation     | 1 |
| YEEZYBOOST350      | 1 |
| Magicdeckbuilding  | 1 |
| ToiletThoughts     | 1 |
| DebateAltRight     | 1 |
| Kings_Raid         | 1 |
| stolendogbeds      | 1 |
| PanPorn            | 1 |
| Costco             | 1 |
| Ipsy               | 1 |

|                       |   |
|-----------------------|---|
| FreeEBOOKS            | 1 |
| girlsinnleggings      | 1 |
| ainbow                | 1 |
| ejuice                | 1 |
| MousepadReview        | 1 |
| Norway                | 1 |
| TheDarwinProject      | 1 |
| Crypto_Currency_News  | 1 |
| radiohead             | 1 |
| recipes               | 1 |
| flashcards            | 1 |
| Mammoth               | 1 |
| BanBanouts            | 1 |
| u_Wolfs_Taco          | 1 |
| sweatcoin             | 1 |
| Slayer                | 1 |
| Rhinoplasty           | 1 |
| Vyvanse               | 1 |
| GoProMarket           | 1 |
| AutoVloggers          | 1 |
| EmpireDidNothingWrong | 1 |
| RedditSnow            | 1 |
| TheWalkingDeadGame    | 1 |
| reclassified          | 1 |
| Cocofleshlights       | 1 |
| grateful_dead         | 1 |
| SummonSign            | 1 |
| NotKenM               | 1 |
| ComplimentMePlease    | 1 |
| outside               | 1 |
| ArtisanMacro          | 1 |
| goodideas             | 1 |
| dune                  | 1 |
| TheresAReddiforThat   | 1 |
| penis                 | 1 |
| shield                | 1 |
| sailing               | 1 |
| myog                  | 1 |
| WowUI                 | 1 |
| GFTJCreampie          | 1 |
| conspiracytheories    | 1 |
| Pauper                | 1 |
| NYGiants              | 1 |
| prettylights          | 1 |
| u_CarlosTheCar        | 1 |



|                  |   |
|------------------|---|
| Contest          | 1 |
| Fallout4Builds   | 1 |
| dungeonrealms    | 1 |
| LGG3             | 1 |
| u_jonwong966     | 1 |
| JerkOffToCelebs  | 1 |
| Dx2SMTLiberation | 1 |
| olkb             | 1 |
| obgyn            | 1 |
| RepTronics       | 1 |
| 100DaysofKeto    | 1 |
| BadMUAs          | 1 |
| medizzy          | 1 |
| glowingeyesshit  | 1 |
| StoneSour        | 1 |
| SmiteTactics     | 1 |
| tacos            | 1 |
| Health           | 1 |
| OWConsole        | 1 |
| FreeGamesOnSteam | 1 |
| pceo             | 1 |
| dogswithjobs     | 1 |
| arcticmonkeys    | 1 |
| subwoofer        | 1 |
| suits            | 1 |
| ps4friends       | 1 |
| NYCbike          | 1 |
| HitBoxPorn       | 1 |
| JRPG             | 1 |
| CrownVictoria    | 1 |
| PS3              | 1 |
| Ducati           | 1 |
| gtamods          | 1 |
| Spanish          | 1 |
| ShadowgunLegends | 1 |
| vancouverbuysell | 1 |
| LogitechG        | 1 |
| TF2WeaponIdeas   | 1 |
| namenerds        | 1 |
| jobcorps         | 1 |
| MindHunter       | 1 |
| MaddieReed       | 1 |
| Composing        | 1 |
| racing           | 1 |
| asktransgender   | 1 |

|                      |   |
|----------------------|---|
| UofO                 | 1 |
| fishtank             | 1 |
| RightRecipes         | 1 |
| yunggravy            | 1 |
| SonyAlpha            | 1 |
| blackfriday          | 1 |
| HaileeSteinfeld      | 1 |
| smoking              | 1 |
| premiere             | 1 |
| boobs                | 1 |
| Pieces               | 1 |
| Electroneum          | 1 |
| CiciKicks            | 1 |
| duelyst              | 1 |
| OverwatchLFG         | 1 |
| neature              | 1 |
| Firearms             | 1 |
| TechNope             | 1 |
| backwoods            | 1 |
| Weldingporn          | 1 |
| prolife              | 1 |
| feetvids             | 1 |
| MusicalTheatreScores | 1 |
| rock                 | 1 |
| Buttcoin             | 1 |
| boulder              | 1 |
| LateNightTalkShows   | 1 |
| RealLifeLore         | 1 |
| FGOcomics            | 1 |
| Lehigh               | 1 |
| njpw                 | 1 |
| catpictures          | 1 |
| depression_help      | 1 |
| crochet              | 1 |
| biology              | 1 |
| pregnant             | 1 |
| GodEater             | 1 |
