# Supplementary material for: Underage JUUL Use Patterns: Content Analysis of Reddit Messages
Source: PubMed Central journal article supplement (PMC6786857; doi:10.2196/13038), 2019-09-09
Supplement: jmir_v21i9e13038_app2.pdf [file jmir_v21i9e13038_app2.pdf]

## Appendix 2. Location summary to each state

|                |    |
|----------------|----|
| Tennessee      | 3  |
| Arkansas       | 0  |
| Maine          | 0  |
| Maryland       | 0  |
| Oklahoma       | 0  |
| Ohio           | 1  |
| Arizona        | 2  |
| Rhode Island   | 0  |
| Colorado       | 4  |
| Alabama        | 0  |
| Pennsylvania   | 3  |
| West Virginia  | 0  |
| Illinois       | 1  |
| Minnesota      | 1  |
| North Carolina | 1  |
| Washington     | 1  |
| New Jersey     | 3  |
| Montana        | 0  |
| Wisconsin      | 1  |
| North Dakota   | 0  |
| Hawaii         | 1  |
| Nebraska       | 0  |
| Kentucky       | 0  |
| New York       | 11 |
| Louisiana      | 0  |
| Texas          | 6  |
| Idaho          | 0  |
| Nevada         | 0  |
| Oregon         | 1  |
| Vermont        | 0  |
| Alaska         | 0  |
| Florida        | 5  |
| Michigan       | 2  |
| Virginia       | 1  |
| Georgia        | 1  |
| Utah           | 1  |
| Delaware       | 0  |
| South Dakota   | 0  |
| Kansas         | 0  |
| Missouri       | 3  |
| New Mexico     | 1  |
| Connecticut    | 1  |
| Iowa           | 0  |

|                |    |
|----------------|----|
| Indiana        | 0  |
| New Hampshire  | 0  |
| South Carolina | 0  |
| Wyoming        | 0  |
| Mississippi    | 0  |
| Massachusetts  | 2  |
| California     | 17 |
